# Supplementary material for: Plant mitochondrial RNA editing factors can perform targeted C-to-U editing of nuclear transcripts in human cells
Source: PubMed Central journal article supplement (PMC9508816; doi:10.1093/nar/gkac752), 2022-09-15
Supplement: gkac752_supplemental_file.pdf [file gkac752_supplemental_file.pdf]

# Plant mitochondrial RNA editing factors can perform targeted C-to-U editing of nuclear transcripts in human cells

Elena Lesch<sup>1</sup>, Maximilian T. Schilling<sup>2</sup>, Sarah Brenner<sup>1</sup>, Yingying Yang<sup>1</sup>, Oliver J. Gruss<sup>2</sup>,  
Volker Knoop<sup>1\*</sup> and Mareike Schallenberg-Rüdinger<sup>1\*</sup>

<sup>1</sup> IZMB - Institut für Zelluläre und Molekulare Botanik, Abteilung Molekulare Evolution, Universität Bonn, Kirschallee 1, D-53115 Bonn, Germany

<sup>2</sup> Institut für Genetik, Abteilung Zellteilung, Universität Bonn, Karlrobert-Kreiten-Str. 13, D-53115 Bonn, Germany

\* To whom correspondence should be addressed. Mareike Schallenberg-Rüdinger: Tel: +49-(0)-228-736464; Fax: +49-(0)-228-73-6467; Email: [mrueding@uni-bonn.de](mailto:mrueding@uni-bonn.de)

Correspondence may also be addressed to Volker Knoop: Tel: +49-(0)-228-73-6466; Fax: +49-(0)-228-73-6467; Email: [volker.knoop@uni-bonn.de](mailto:volker.knoop@uni-bonn.de)

## Supplementary Material

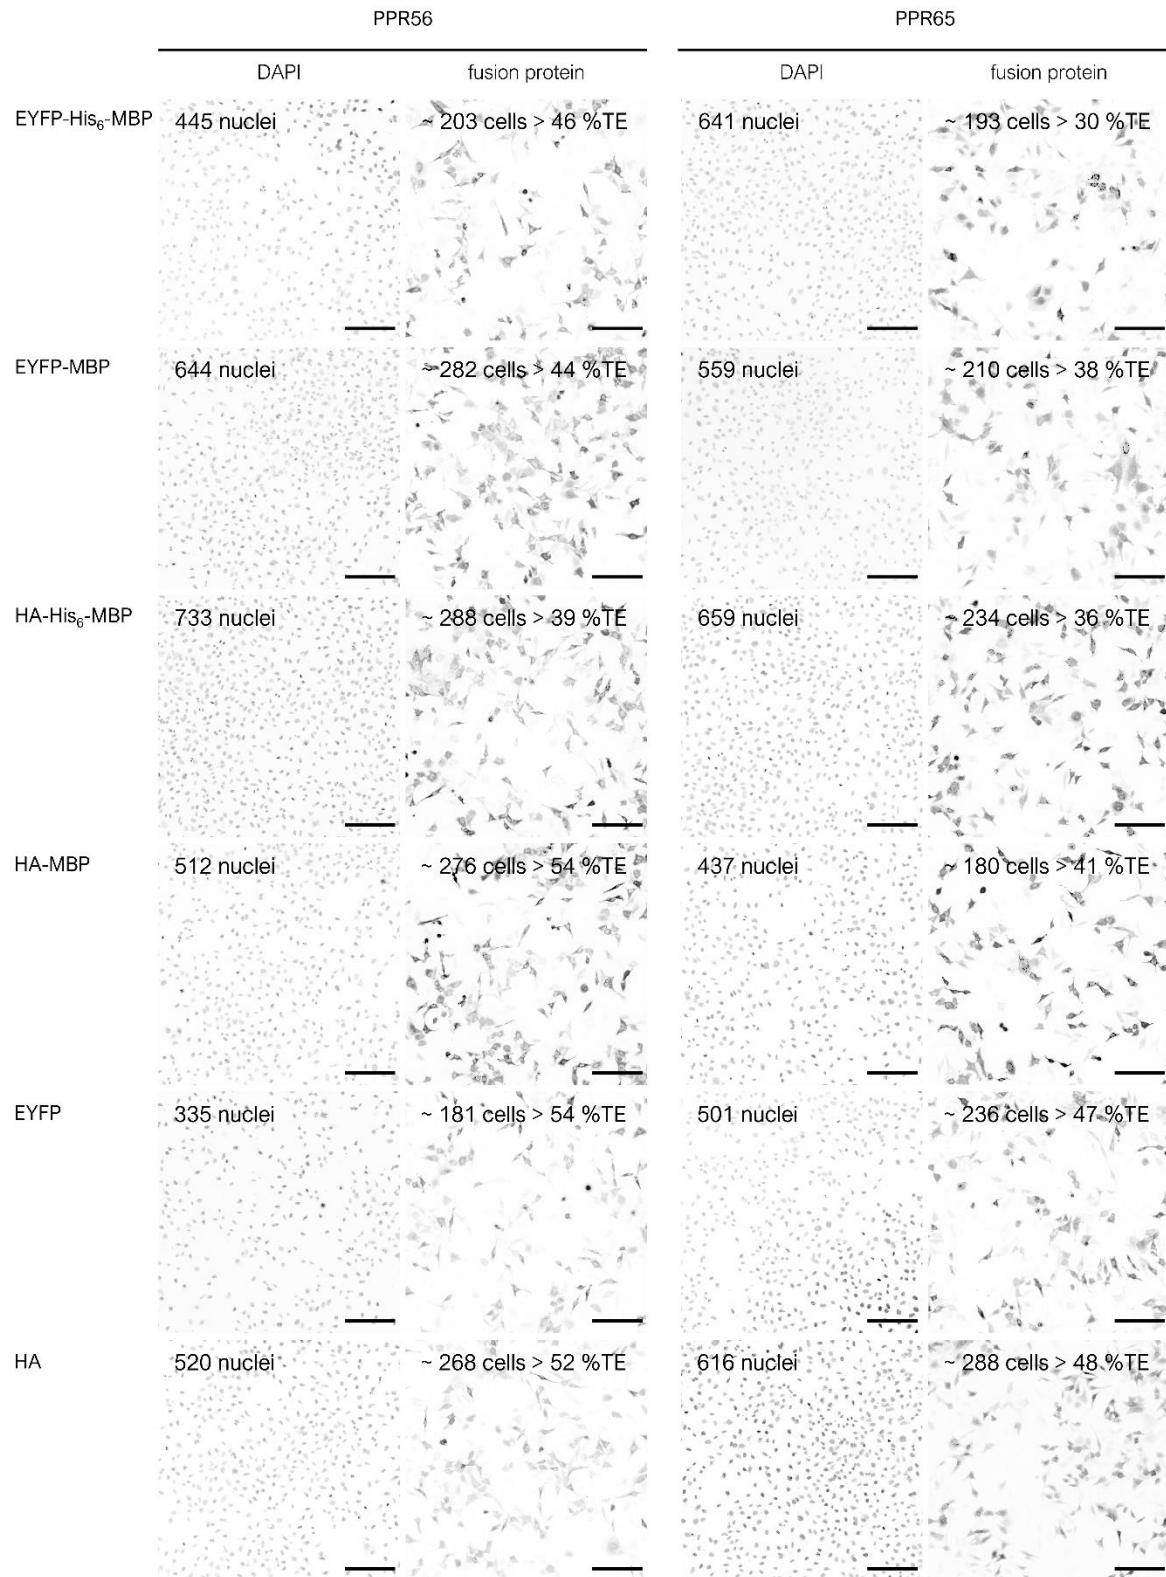

**Supplementary Figure S1. Transfection rate calculation via HA and EYFP immunostained fusion proteins per DAPI stained nuclei.**

After fixation and immunostaining of HeLa cells, expressing N-terminally tagged PPR56 or PPR65, 960.93x960.93  $\mu\text{m}$  overview images were taken with a Nikon Eclipse Ti2 system equipped with a PlanFluor 40x Oil objective (NA 1.3) and 1.5x Zoom using the NIS-Elements AR software. In ImageJ/Fiji version 1.53c for Windows, the color channels were split. The DAPI image was transformed into a B&W binary and close nuclei were separated using the 'Watershed' and counted using the 'Analyze Particles' function with a size threshold of 1000  $\mu\text{m}^2$ . Alexa594 fluorescence was displayed as inverted grayscale for counting fusion protein expressing cell. Transfection efficiencies (%TE) were defined as the number of fusion proteins expressing cells per total nuclei. Scale bars = 200  $\mu\text{m}$ .

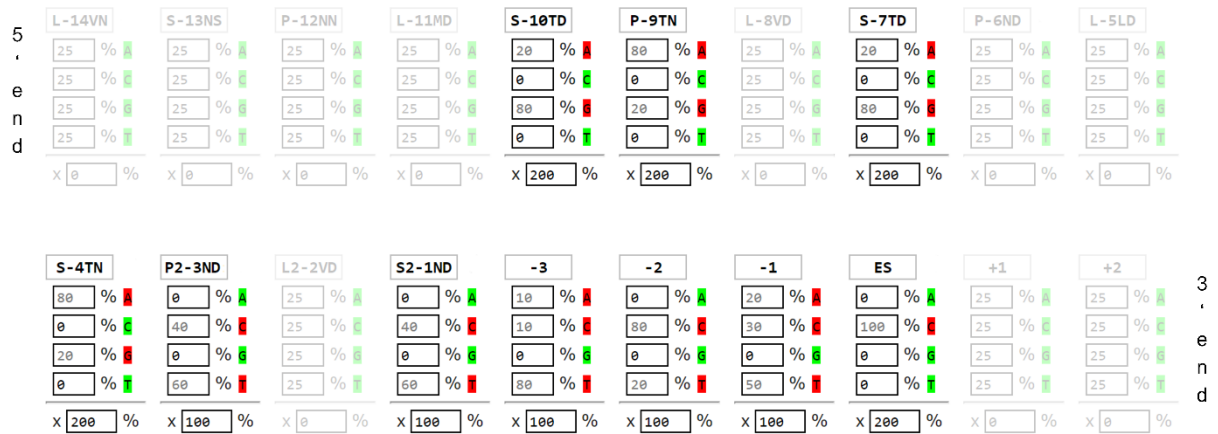

Supplementary Figure S2. Weight matrix used for scanning the custom IMR-90 transcriptome for putative PPR56 editing sites by the TargetScan tool of PREPACT (1).

Each column corresponds to one nucleotide position and is labelled either (i) with type, position counting from S2, and fifth and last amino acid of the corresponding PPR or (ii) with the position relative to the editing site (ES). Nucleotide distributions were set according to the published PPR-RNA binding code (2) and specific knowledge about PPR56 off-target sequence conservation (3). Positional weights are shown below. Positions with no given weight (0%) and no influence on target selection are shaded in light grey.

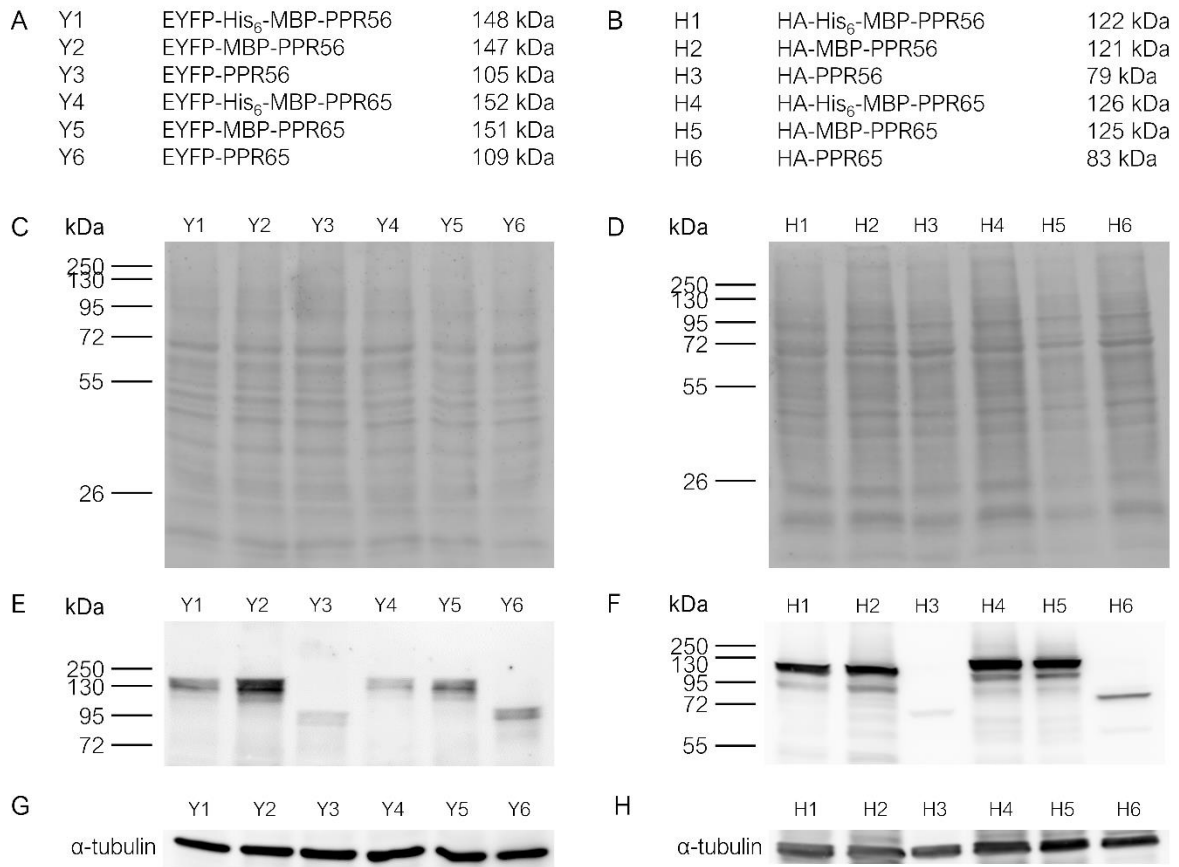

**Supplementary Figure S3. Western Blot analyses of fusion protein expression in HeLa cells.**

A, B: Investigated fusion proteins and corresponding molecular weights in kDa (calculated with BCCM Genecorner, [https://www.genecorner.ugent.be/protein\\_mw.html](https://www.genecorner.ugent.be/protein_mw.html)). C, D: Total protein stained with Ponceau. E: Immunodetection of EYFP-tagged PPR proteins with  $\alpha$ -GFP (mouse, Roth) and peroxidase labeled secondary antibody (Jackson ImmunoResearch). F: Immunodetection of HA-tagged PPR proteins with  $\alpha$ -HA (rabbit, abcam ab91110) and peroxidase labeled secondary antibody (Jackson ImmunoResearch). G, H: Immunodetection of  $\alpha$ -tubulin with  $\alpha$ - $\alpha$ -tubulin (rabbit, Cell Signaling cat. #2125) and peroxidase labeled secondary antibody (Jackson ImmunoResearch) as loading control.

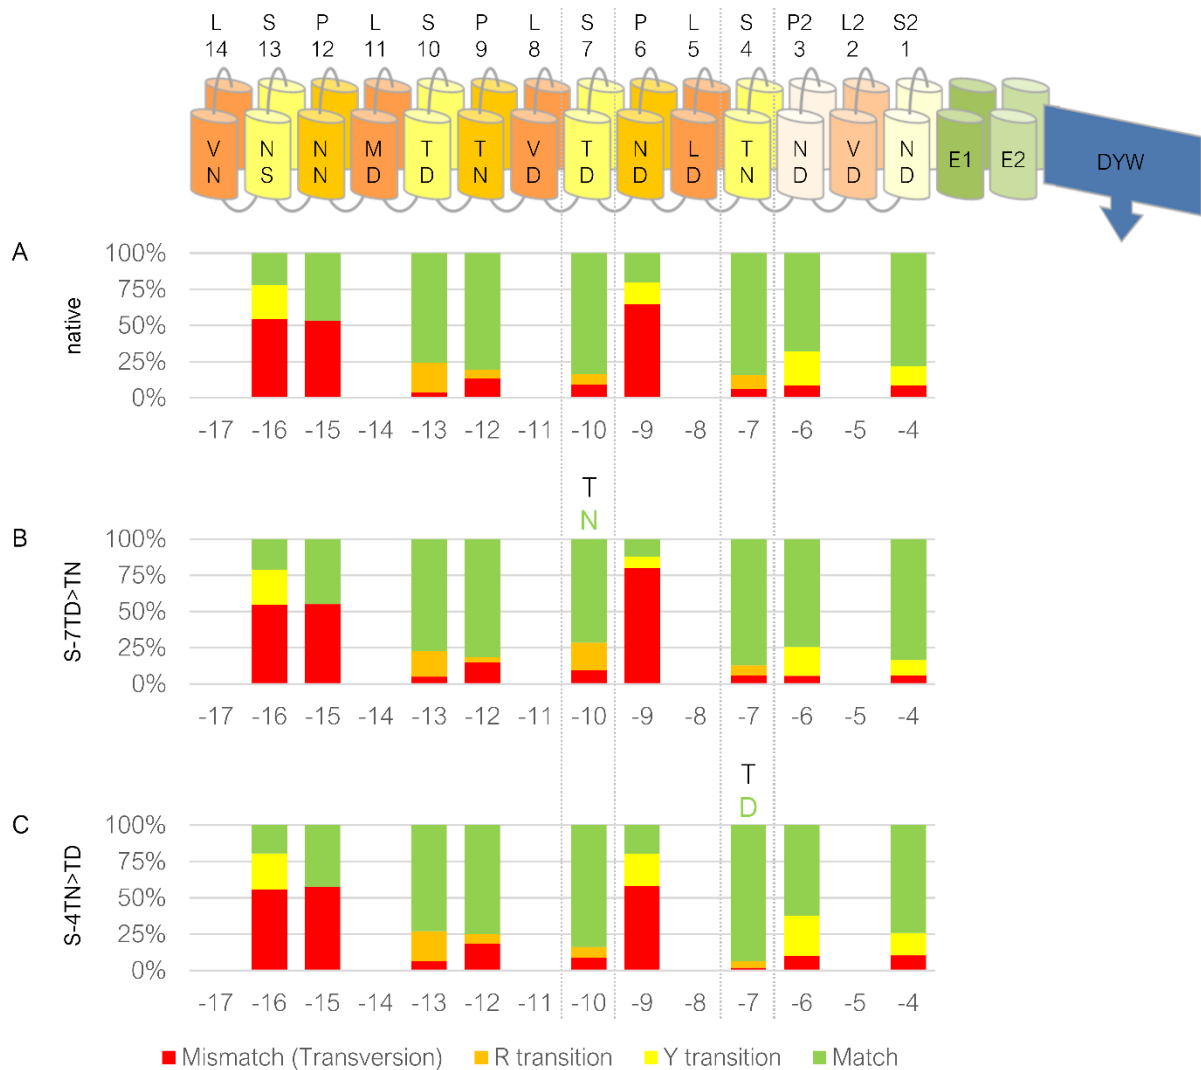

**Supplementary Figure S4. Matches of individual PPRs and their corresponding nucleotides for the off-target data sets of PPR56 and the two investigated mutants S-4TN-TD and S-7TD-TN**

The bar charts show the relative amounts of conceptual matches between PPRs and their target nucleotides (green), pyrimidine and purine transitions (yellow and orange, respectively) and transversion mismatches (red) at the respective positions observed for the off-targets determined for the native PPR56 protein (A) and the two investigated mutants (B and C).

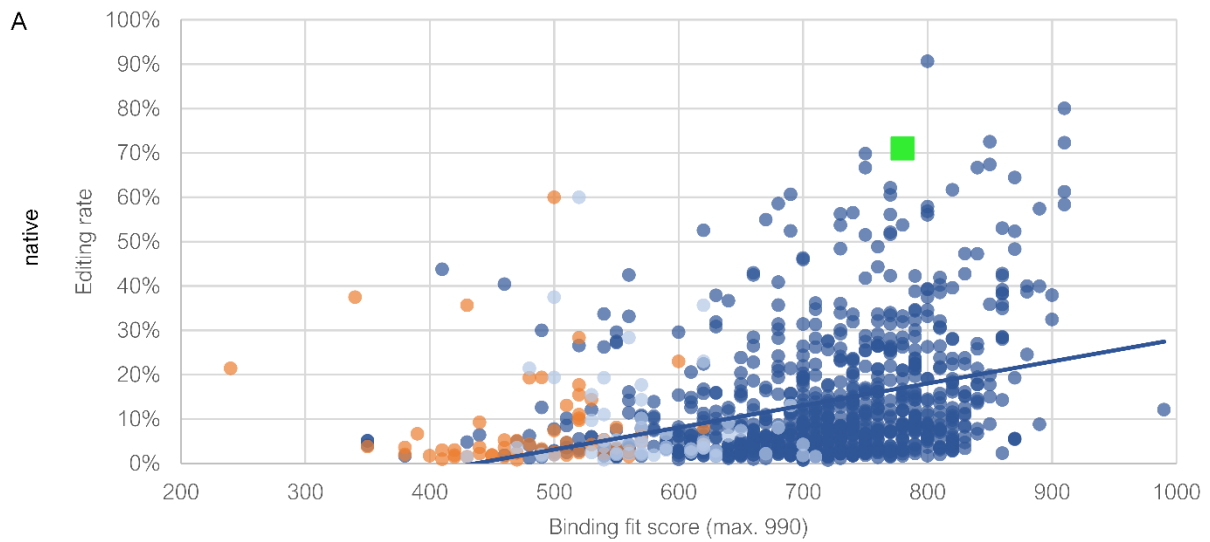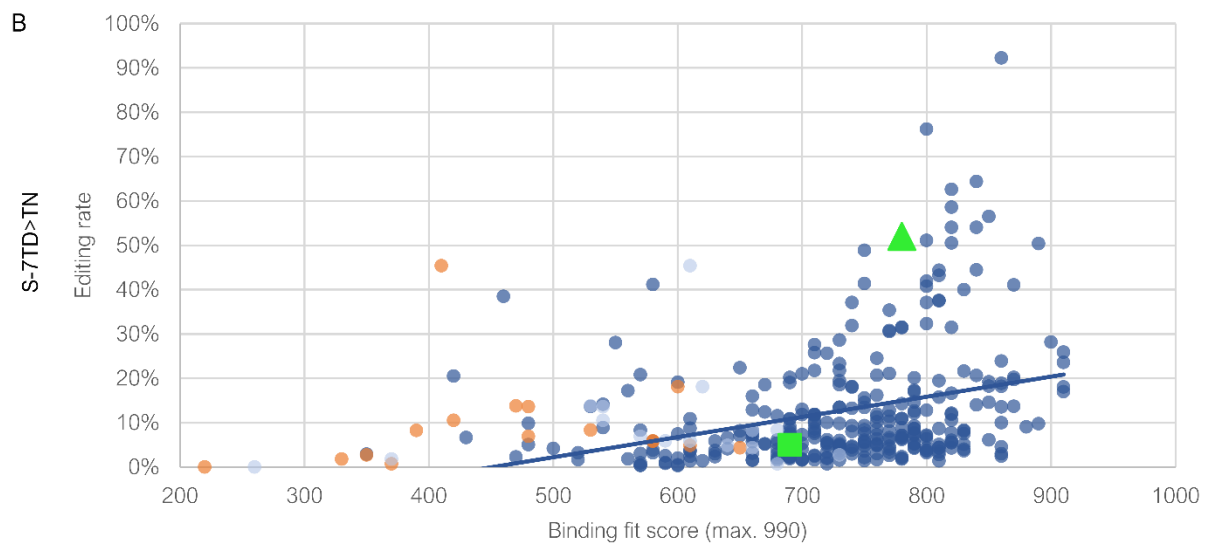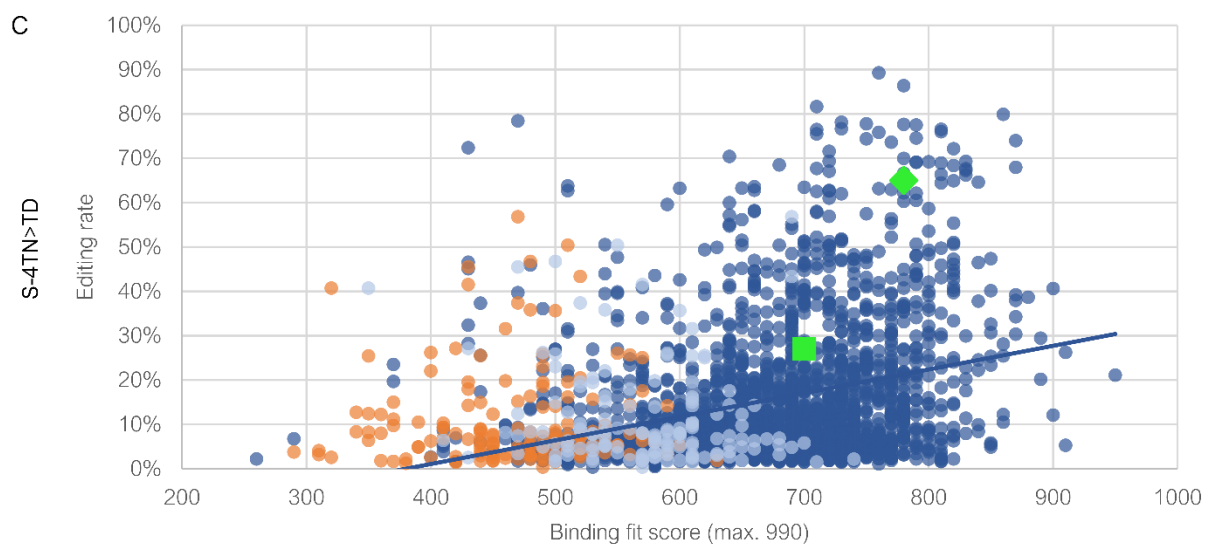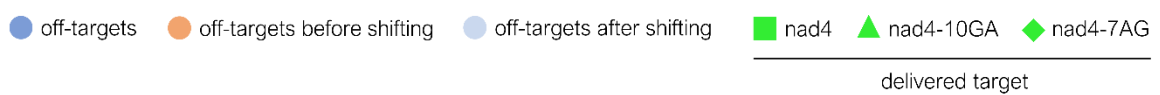

**Supplementary Figure S5. Scatter Plots correlating RNA editing efficiencies with the conceptual overall binding score at the off-targets for wild-type and the two mutant variants of PPR56.**

Scatter plot of RNA editing efficiencies on the y-axis displayed in relation to conceptual matching scores (as described in figure 9) on the x-axis for the off-targets (dark blue dots) determined for the native PPR56 protein (A) and the two investigated mutants (B and C). Better matching scores are observed for ca. 5-6 % of off-targets (orange dots; 59 of 906 for PPR56, 16 of 323 for the S-7TN mutant and 147 of 2265 for the S-4TD mutant, respectively) after one- or two-nucleotide-shifts (light blue dots), away from the canonical juxtaposition of the terminal S2-type PPR with position -4 upstream of the editing sites. Editing at the co-delivered targets (green symbols) are added for reference.



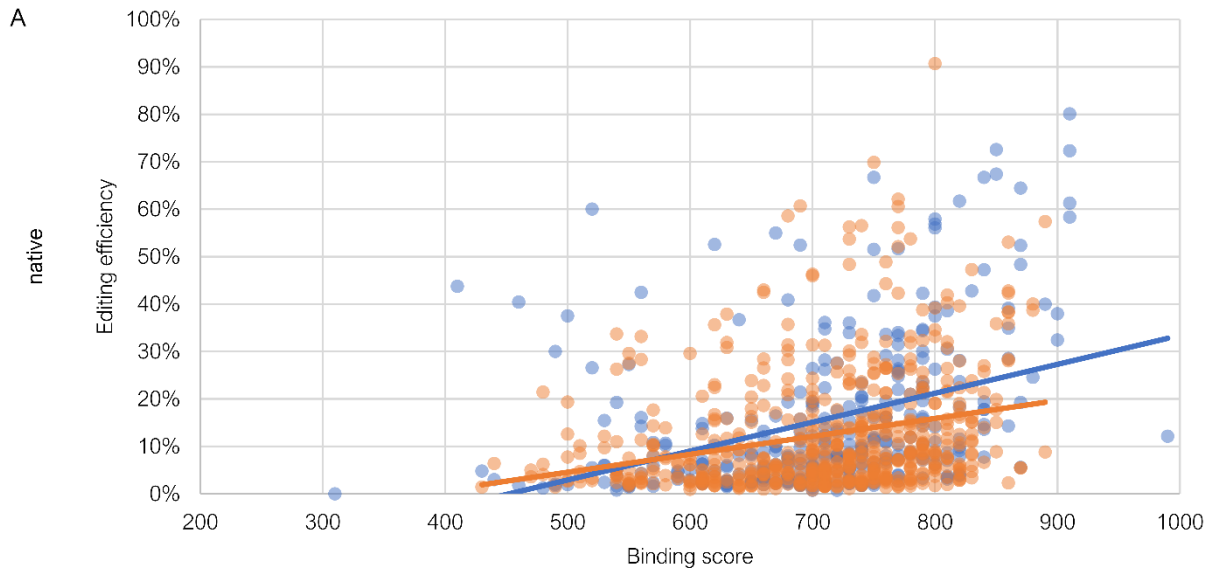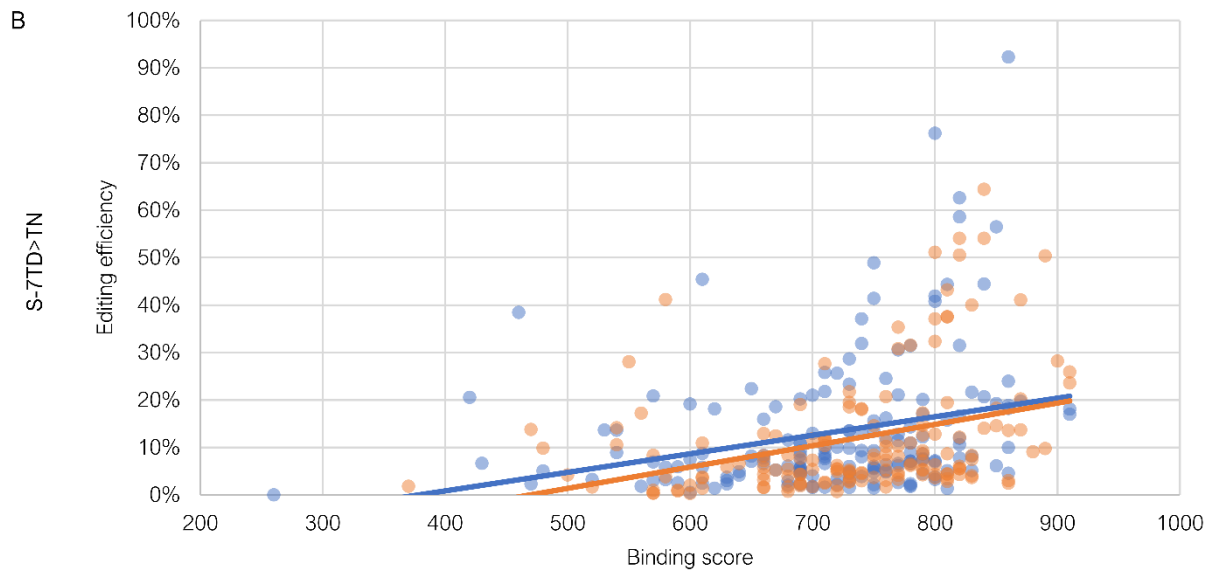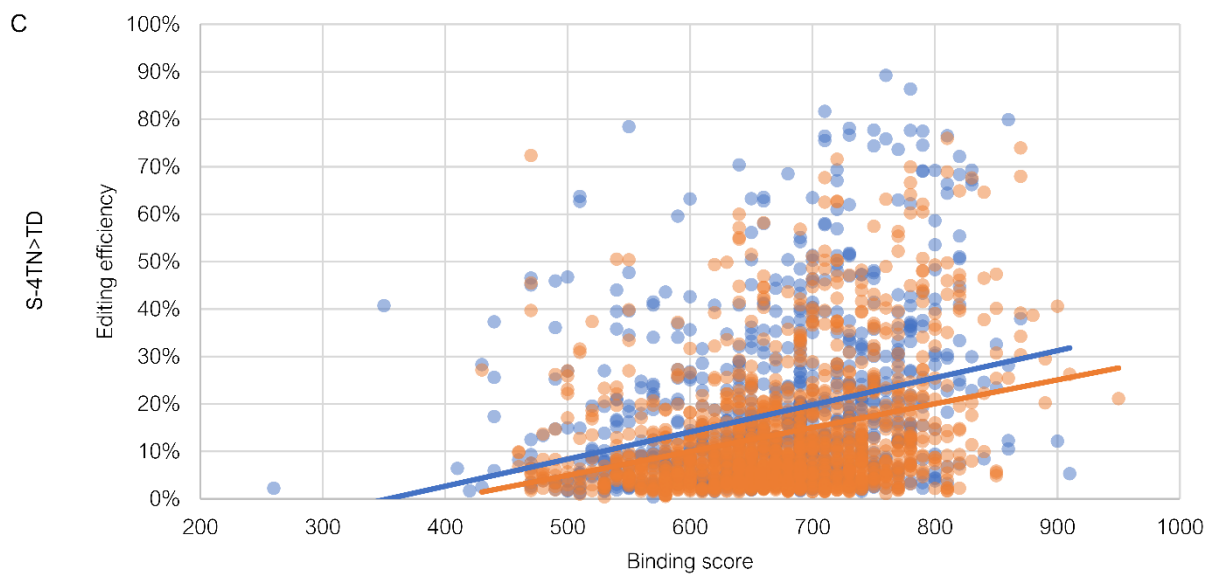

● off-target in non-coding region      ● off-targets in coding region

**Supplementary Figure S6. Scatter Plots distinguishing off-targets occurring in coding vs. non-coding transcript regions.**

Off-targets as analyzed in supplementary figure S5 (after nucleotide shifting for improved matching scores where applicable) classified by their occurrence in coding sequences (orange) or in non-coding regions (blue).

Supplementary Table S1

Oligonucleotides/ gBlocks used in this study.

| #   | Name                  | Purpose/ target                          | Sequence (5'-3')                                                                                                                                                                                                                                                                                                                      |
|-----|-----------------------|------------------------------------------|---------------------------------------------------------------------------------------------------------------------------------------------------------------------------------------------------------------------------------------------------------------------------------------------------------------------------------------|
| P1  | PPR56_P9_R            | Cloning of PPR56 S motif mutant versions | GTTTGAATCCTTCCTGTTCC                                                                                                                                                                                                                                                                                                                  |
| P2  | PPR56_P6_F            | Cloning of PPR56 S motif mutant versions | GGCATGAAGCATATGATCTG                                                                                                                                                                                                                                                                                                                  |
| P3  | PPR56_P6_R            | Cloning of PPR56 S motif mutant versions | CAGATCATATGCTTCATGCC                                                                                                                                                                                                                                                                                                                  |
| P4  | PPR56_P3_F            | Cloning of PPR56 S motif mutant versions | GCTTGGCACAACATGGTC                                                                                                                                                                                                                                                                                                                    |
| P5  | Gw_PPR56_-n_for       | Cloning PPR into petG41K                 | GGGGACAAGTTTGTACAAAAAAGCAGGCTTAGAGAATCTTTATTTTCAGGGCGTGGTTCTGATGAACCGTC                                                                                                                                                                                                                                                               |
| P6  | Gw_PPR56_-n_rev       | Cloning PPR into petG41K                 | GGGGACCACCTTTGTACAAGAAAGCTGGGTCTCACCAGTAATCACCACATG                                                                                                                                                                                                                                                                                   |
| P7  | 175641Ppfor           | Cloning PPR into petG41K                 | GGGGACAAGTTTGTACAAAAAAGCAGGCTTAGAGAATCTTTATTTTCAGGGCTCTCAGATCAGATGCCAGGG                                                                                                                                                                                                                                                              |
| P8  | 175641Ppcomprev       | Cloning PPR into petG41K                 | GGGGACCACCTTTGTACAAGAAAGCTGGGTCTCACCACAAAAATCCCCACAAGAACATAC                                                                                                                                                                                                                                                                          |
| P9  | EGFP_MBP_for_Scal     | Cloning PPR-target expression cassette   | GCCAGTACTCCATGAAAAATCGAAGAAGG                                                                                                                                                                                                                                                                                                         |
| P10 | EGFP_TEV_for_Scal     | Cloning PPR-target expression cassette   | GCCAGTACTTAGAGAATCTTTATTTTCAGG                                                                                                                                                                                                                                                                                                        |
| P11 | EGFP_tT7_rev_Apal     | Cloning PPR-target expression cassette   | ATGGGCCCTAGTTATTGCTCAGCGGTGG                                                                                                                                                                                                                                                                                                          |
| P12 | CMV_His_for_Mscl      | Cloning PPR-target expression cassette   | ATTATATGGCCAAACATCACCATCACCATCACC                                                                                                                                                                                                                                                                                                     |
| P13 | CMV_MBP_for_Mscl      | Cloning PPR-target expression cassette   | ATTATATGGCCACCATGAAAAATCGAAGAAGG                                                                                                                                                                                                                                                                                                      |
| P14 | CMV_TEV_for_Mscl      | Cloning PPR-target expression cassette   | ACTATATGGCCATAGAGAATCTTTATTTTCAGG                                                                                                                                                                                                                                                                                                     |
| P15 | CMV_tT7_rev_NotI      | Cloning PPR-target expression cassette   | ATTATAGCGGCCGCTAGTTATTGCTCAGCGGTGG                                                                                                                                                                                                                                                                                                    |
| P16 | pCMV-HA_seq_for       | Cloning PPR-target expression cassette   | CGGAATTGTACCCGCGGGCC                                                                                                                                                                                                                                                                                                                  |
| P17 | pCMV-HA_seq_rev       | Cloning PPR-target expression cassette   | ATTCTAGTTGTGGTTTGTCC                                                                                                                                                                                                                                                                                                                  |
| P18 | EGFP_His_for_Scal_MOD | Cloning PPR-target expression cassette   | GCCAGTACTTACATCACCATCACCATCACC                                                                                                                                                                                                                                                                                                        |
| P19 | PPR56_4-7ag_F         | Cloning target                           | AAATATCAATTTTTATATAGgtatagacggtGtctcttcATTTTGG                                                                                                                                                                                                                                                                                        |
| P20 | PPR56_4-7ag_R         | Cloning target                           | CGCGCCAAAATGAAGAGACACCGTCTATACCTATATAAAAAATTGATATT                                                                                                                                                                                                                                                                                    |
| P21 | PPR56_4-10ga_F        | Cloning target                           | AAATATCAATTTTTATATAGgtatagacAgtatctcttcATTTTGG                                                                                                                                                                                                                                                                                        |
| P22 | PPR56_4-10ga_R        | Cloning target                           | CGCGCCAAAATGAAGAGATACTGTCTATACCTATATAAAAAATTGATATT                                                                                                                                                                                                                                                                                    |
| P23 | PPR56_nad4_F          | Cloning target                           | TCAAACATCAATTTTTATATAGgtatagacggtatctcttcATTTT                                                                                                                                                                                                                                                                                        |
| P24 | PPR56_nad4_R          | Cloning target                           | CGCGAAAATGAAGAGATACCGTCTATACCTATATAAAAAATTGATGTTTGA                                                                                                                                                                                                                                                                                   |
| P25 | HindIIIccmFC_for      | Cloning target                           | agcttATACTATTTCAATGGTTGGTAAGTAGAGATGTTCCACAtt                                                                                                                                                                                                                                                                                         |
| P26 | Bsp119iccmFC_rev      | Cloning target                           | CGAATGTGGGAACATCTCTACTTACCAACCATTGAAATAGTATA                                                                                                                                                                                                                                                                                          |
| P27 | petG_30K40Kseqrev     | Editing analysis/ Sequencing             | GGTTATGCTAGTTATTGCTCAGC                                                                                                                                                                                                                                                                                                               |
| P28 | PPR56_CTDH_R          | PPR mutagenesis DYW domain               | CTTAGTTGCTCCATGAGCATCGGTGCACACCCG                                                                                                                                                                                                                                                                                                     |
| P29 | PPR56_CTDH_F          | PPR mutagenesis DYW domain               | CGGGTGTGCACCCGATGCTCATGGAGCAACTAAG                                                                                                                                                                                                                                                                                                    |
| P30 | PPR65_HSARLAfor       | PPR mutagenesis DYW domain               | CTTTTCTCTCACAGTGCGAGGCTGGCGATCAC                                                                                                                                                                                                                                                                                                      |
| P31 | PPR65_HSARLArev       | PPR mutagenesis DYW domain               | GTGATCGCCAGCCTCGCACTGTGAGAGAAAAG                                                                                                                                                                                                                                                                                                      |
| P32 | PPR65_CGDAH_for       | PPR mutagenesis DYW domain               | CGAGTGTGTGGGATGCTCATACGGCGACGAAG                                                                                                                                                                                                                                                                                                      |
| P33 | PPR65_CGDAH_rev       | PPR mutagenesis DYW domain               | CTTCGTGCGCGTATGAGCATCCCCACACACTCG                                                                                                                                                                                                                                                                                                     |
| P34 | PPR56_HSERLA_F        | PPR mutagenesis DYW domain               | CTCACAGTGAGaggTTGGCAATTGTG                                                                                                                                                                                                                                                                                                            |
| P35 | PPR56_HSERLA_R        | PPR mutagenesis DYW domain               | CACAATTGCCAACCTCTCACTGTGAG                                                                                                                                                                                                                                                                                                            |
| P36 | PPR56_S4TNTD_for      | PPR mutagenesis S4 motif (gBlock IDT)    | GTGGGCATGAAGCATATGATCTGTTTCTTCAGATGCAGACAGAGGGCTGTAAGCCAGATGCAATCATGTTTTGAGCATCTTGAATGCATGTGCAAGTGC<br>AGGGGCATTGGAGTGGGTGAAGAAGATTACAGGCATGCCTTGATTGAGGGCTTGAGGTTGATGTGCGTGTGGGCACTGCACCTGTTACATGTA<br>CAAAGAGTGGTAGCATTGATGATGCGCGAGTGGTGTGGACAGAATGAAGGTGCGCgATGTTGATCATGGAATGCGATGATTTCTGGCTTGGCACAAC<br>ATGGTCTTGGGCAAGGACGCTTTG |
| P37 | PPR56_S-7TDTN_for     | PPR mutagenesis S7 motif (gBlock IDT)    | TGGAACAGGAAGGATTCAAACCAATGCAATCACTTATGTGAGCATCTTGAACGCATGTGCAAGTGAAGGGGCACTTGAAGTGGGTGAAGAGGGTTCAC<br>AGGCATGCCTTGGATGCAGGGCTTGGATTGGATGTGCGTGTGGGCACTGCACCTGTTCAAATGTACGCAAAGAGTGGTAGCATTGATGCACGAGT<br>GGTGTGGACAGAATGAAGGTGCGTgATGTTGATCATGGAATGTGATGATAGGCGCATTGACAGAACATGGGCGTGGGCATGAAGCATATGATCTGTT<br>CTTC                    |
| P38 | PPR56_int_for         | PPR56 internal/ Sequencing               | TTGAATGCATGTGCAAGTGC                                                                                                                                                                                                                                                                                                                  |
| P39 | PPR65_intseq_rev      | PPR65 internal/ Sequencing               | CCAGACTTGCATCCATGC                                                                                                                                                                                                                                                                                                                    |
| P40 | 175641KOfor           | PPR65 internal/ Sequencing               | ATGGAAATTGTTGAAGCTGGACTGG                                                                                                                                                                                                                                                                                                             |

|                      |                            |                                        |
|----------------------|----------------------------|----------------------------------------|
| P41 PPR65_PAbox_rev  | PPR65 internal/ Sequencing | CTTCAATCCAGCTCTGCGCCGGCTCCTTGACAACATCC |
| P42 PPR65edit_f      | PPR65 internal/ Sequencing | TATCTACGCTGCTGCTGGCC                   |
| P43 pEGFP-C3_seq_for | Sequencing                 | GATCACTCTCGGCATGGACG                   |
| P44 pEGFP-CR_seq_rev | Sequencing                 | CTCTACAAATGTGGTATGGC                   |
| P45 mbppetG40Kseqfor | Sequencing                 | GAT GTC CGC TTT CTG GTA TGC            |
| P46 TEVrev           | Sequencing                 | CCTGAAAATAAAGATTCTC                    |
| P47 EYFPfor          | Sequencing                 | CACCTTGACCTACGGCGTGC                   |

## Supplementary Table S2

**Results of all individual RNA editing experiments in the heterologous human cell and *E. coli* setups.** The experimental conditions (type and number of cells seeded for transfection [human cells]/ of cells induced by addition of 0.4 mM isopropyl  $\beta$ -D-1-thiogalactopyranoside (IPTG) [*E. coli* ], incubation time after transfection [human cells]/ after induction [*E. coli* ], media and zinc supplementation) and C-U RNA editing rate of each individual replicate is listed.

| #  | Organism | Experiment | Cell line | Construct                                   | Incubation | Cell number         | Media             | Zinc       | Editing | Study      |
|----|----------|------------|-----------|---------------------------------------------|------------|---------------------|-------------------|------------|---------|------------|
| 1  | Human    | Cell line  | HEK-293   | HA-His <sub>6</sub> -MBP-PPR56+nad4_native  | 20h        | 2x10 <sup>5</sup>   | DMEM+FCS+Penstrep | 25 $\mu$ M | 46%     | This study |
| 2  | Human    | Cell line  | HEK-293   | HA-His <sub>6</sub> -MBP-PPR56+nad4_native  | 20h        | 2x10 <sup>5</sup>   | DMEM+FCS+Penstrep | 25 $\mu$ M | 57%     | This study |
| 3  | Human    | Cell line  | HEK-293   | HA-His <sub>6</sub> -MBP-PPR56+nad4_native  | 20h        | 2x10 <sup>5</sup>   | DMEM+FCS+Penstrep | 25 $\mu$ M | 50%     | This study |
| 4  | Human    | Cell line  | HEK-293   | HA-His <sub>6</sub> -MBP-PPR65+ccmFC_native | 20h        | 2x10 <sup>5</sup>   | DMEM+FCS+Penstrep | 25 $\mu$ M | 34%     | This study |
| 5  | Human    | Cell line  | HEK-293   | HA-His <sub>6</sub> -MBP-PPR65+ccmFC_native | 20h        | 2x10 <sup>5</sup>   | DMEM+FCS+Penstrep | 25 $\mu$ M | 39%     | This study |
| 6  | Human    | Cell line  | HEK-293   | HA-His <sub>6</sub> -MBP-PPR65+ccmFC_native | 20h        | 2x10 <sup>b</sup>   | DMEM+FCS+Penstrep | 25 $\mu$ M | 36%     | This study |
| 7  | Human    | Cell line  | HEK-293   | EYFP-PPR56+nad4_native                      | 20h        | 2x10 <sup>5</sup>   | DMEM+FCS+Penstrep | 25 $\mu$ M | 50%     | This study |
| 8  | Human    | Cell line  | HEK-293   | EYFP-PPR56+nad4_native                      | 20h        | 2x10 <sup>5</sup>   | DMEM+FCS+Penstrep | 25 $\mu$ M | 52%     | This study |
| 9  | Human    | Cell line  | HEK-293   | EYFP-PPR56+nad4_native                      | 20h        | 2x10 <sup>5</sup>   | DMEM+FCS+Penstrep | 25 $\mu$ M | 55%     | This study |
| 10 | Human    | Cell line  | HEK-293   | EYFP-PPR65+ccmFC_native                     | 20h        | 2x10 <sup>5</sup>   | DMEM+FCS+Penstrep | 25 $\mu$ M | 17%     | This study |
| 11 | Human    | Cell line  | HEK-293   | EYFP-PPR65+ccmFC_native                     | 20h        | 2x10 <sup>5</sup>   | DMEM+FCS+Penstrep | 25 $\mu$ M | 13%     | This study |
| 12 | Human    | Cell line  | HEK-293   | EYFP-PPR65+ccmFC_native                     | 20h        | 2x10 <sup>5</sup>   | DMEM+FCS+Penstrep | 25 $\mu$ M | 13%     | This study |
| 13 | Human    | Cell line  | IMR-90    | HA-His <sub>6</sub> -MBP-PPR56+nad4_native  | 20h        | 1.8x10 <sup>5</sup> | MEM+FCS+Penstrep  | 25 $\mu$ M | 59%     | This study |
| 14 | Human    | Cell line  | IMR-90    | HA-His <sub>6</sub> -MBP-PPR56+nad4_native  | 20h        | 1.8x10 <sup>5</sup> | MEM+FCS+Penstrep  | 25 $\mu$ M | 60%     | This study |
| 15 | Human    | Cell line  | IMR-90    | HA-His <sub>6</sub> -MBP-PPR56+nad4_native  | 20h        | 1.8x10 <sup>5</sup> | MEM+FCS+Penstrep  | 25 $\mu$ M | 61%     | This study |
| 16 | Human    | Cell line  | IMR-90    | HA-His <sub>6</sub> -MBP-PPR65+ccmFC_native | 20h        | 1.8x10 <sup>5</sup> | MEM+FCS+Penstrep  | 25 $\mu$ M | 33%     | This study |
| 17 | Human    | Cell line  | IMR-90    | HA-His <sub>6</sub> -MBP-PPR65+ccmFC_native | 20h        | 1.8x10 <sup>b</sup> | MEM+FCS+Penstrep  | 25 $\mu$ M | 30%     | This study |
| 18 | Human    | Cell line  | IMR-90    | HA-His <sub>6</sub> -MBP-PPR65+ccmFC_native | 20h        | 1.8x10 <sup>5</sup> | MEM+FCS+Penstrep  | 25 $\mu$ M | 30%     | This study |
| 19 | Human    | Cell line  | IMR-90    | EYFP-PPR56+nad4_native                      | 20h        | 1.8x10 <sup>5</sup> | MEM+FCS+Penstrep  | 25 $\mu$ M | 69%     | This study |
| 20 | Human    | Cell line  | IMR-90    | EYFP-PPR56+nad4_native                      | 20h        | 1.8x10 <sup>5</sup> | MEM+FCS+Penstrep  | 25 $\mu$ M | 73%     | This study |
| 21 | Human    | Cell line  | IMR-90    | EYFP-PPR56+nad4_native                      | 20h        | 1.8x10 <sup>5</sup> | MEM+FCS+Penstrep  | 25 $\mu$ M | 73%     | This study |
| 22 | Human    | Cell line  | IMR-90    | EYFP-PPR65+ccmFC_native                     | 20h        | 1.8x10 <sup>5</sup> | MEM+FCS+Penstrep  | 25 $\mu$ M | 2%      | This study |
| 23 | Human    | Cell line  | IMR-90    | EYFP-PPR65+ccmFC_native                     | 20h        | 1.8x10 <sup>5</sup> | MEM+FCS+Penstrep  | 25 $\mu$ M | 2%      | This study |
| 24 | Human    | Cell line  | IMR-90    | EYFP-PPR65+ccmFC_native                     | 20h        | 1.8x10 <sup>5</sup> | MEM+FCS+Penstrep  | 25 $\mu$ M | 0%      | This study |
| 25 | Human    | Cell line  | MCF-7     | HA-His <sub>6</sub> -MBP-PPR56+nad4_native  | 20h        | 2x10 <sup>b</sup>   | DMEM+FCS+Penstrep | 25 $\mu$ M | 64%     | This study |
| 26 | Human    | Cell line  | MCF-7     | HA-His <sub>6</sub> -MBP-PPR56+nad4_native  | 20h        | 2x10 <sup>5</sup>   | DMEM+FCS+Penstrep | 25 $\mu$ M | 71%     | This study |
| 27 | Human    | Cell line  | MCF-7     | HA-His <sub>6</sub> -MBP-PPR56+nad4_native  | 20h        | 2x10 <sup>5</sup>   | DMEM+FCS+Penstrep | 25 $\mu$ M | 74%     | This study |
| 28 | Human    | Cell line  | MCF-7     | HA-His <sub>6</sub> -MBP-PPR65+ccmFC_native | 20h        | 2x10 <sup>b</sup>   | DMEM+FCS+Penstrep | 25 $\mu$ M | 61%     | This study |
| 29 | Human    | Cell line  | MCF-7     | HA-His <sub>6</sub> -MBP-PPR65+ccmFC_native | 20h        | 2x10 <sup>5</sup>   | DMEM+FCS+Penstrep | 25 $\mu$ M | 63%     | This study |
| 30 | Human    | Cell line  | MCF-7     | HA-His <sub>6</sub> -MBP-PPR65+ccmFC_native | 20h        | 2x10 <sup>5</sup>   | DMEM+FCS+Penstrep | 25 $\mu$ M | 63%     | This study |
| 31 | Human    | Cell line  | MCF-7     | EYFP-PPR56+nad4_native                      | 20h        | 2x10 <sup>5</sup>   | DMEM+FCS+Penstrep | 25 $\mu$ M | 37%     | This study |
| 32 | Human    | Cell line  | MCF-7     | EYFP-PPR56+nad4_native                      | 20h        | 2x10 <sup>5</sup>   | DMEM+FCS+Penstrep | 25 $\mu$ M | 47%     | This study |
| 33 | Human    | Cell line  | MCF-7     | EYFP-PPR56+nad4_native                      | 20h        | 2x10 <sup>5</sup>   | DMEM+FCS+Penstrep | 25 $\mu$ M | 44%     | This study |
| 34 | Human    | Cell line  | MCF-7     | EYFP-PPR65+ccmFC_native                     | 20h        | 2x10 <sup>5</sup>   | DMEM+FCS+Penstrep | 25 $\mu$ M | 25%     | This study |





|     |                         |                 |                 |                                               |     |                                            |                   |       |     |            |
|-----|-------------------------|-----------------|-----------------|-----------------------------------------------|-----|--------------------------------------------|-------------------|-------|-----|------------|
| 119 | Human                   | S motif mutants | IMR-90          | EYFP-PPR56_S7mut+nad4_native                  | 20h | 2x10 <sup>5</sup>                          | MEM+FCS+Penstrep  | 25μM  | 0%  | This study |
| 120 | Human                   | S motif mutants | IMR-90          | EYFP-PPR56_S7mut+nad4_native                  | 20h | 2x10 <sup>5</sup>                          | MEM+FCS+Penstrep  | 25μM  | 0%  | This study |
| 121 | Human                   | S motif mutants | IMR-90          | EYFP-PPR56_S4mut+nad4_-7ag                    | 20h | 2x10 <sup>5</sup>                          | MEM+FCS+Penstrep  | 25μM  | 70% | This study |
| 122 | Human                   | S motif mutants | IMR-90          | EYFP-PPR56_S4mut+nad4_-7ag                    | 20h | 2x10 <sup>5</sup>                          | MEM+FCS+Penstrep  | 25μM  | 67% | This study |
| 123 | Human                   | S motif mutants | IMR-90          | EYFP-PPR56_S4mut+nad4_-7ag                    | 20h | 2x10 <sup>5</sup>                          | MEM+FCS+Penstrep  | 25μM  | 58% | This study |
| 124 | Human                   | S motif mutants | IMR-90          | EYFP-PPR56_S7mut+nad4_-10ga                   | 20h | 2x10 <sup>5</sup>                          | MEM+FCS+Penstrep  | 25μM  | 31% | This study |
| 125 | Human                   | S motif mutants | IMR-90          | EYFP-PPR56_S7mut+nad4_-10ga                   | 20h | 2x10 <sup>5</sup>                          | MEM+FCS+Penstrep  | 25μM  | 29% | This study |
| 126 | Human                   | S motif mutants | IMR-90          | EYFP-PPR56_S7mut+nad4_-10ga                   | 20h | 2x10 <sup>5</sup>                          | MEM+FCS+Penstrep  | 25μM  | 30% | This study |
| 127 | Human                   | Zinc/time       | HeLa            | EYFP-PPR56+nad4_native                        | 14h | 1x10 <sup>5</sup>                          | DMEM+FCS+Penstrep | 100μM | 39% | This study |
| 128 | Human                   | Zinc/time       | HeLa            | EYFP-PPR56+nad4_native                        | 14h | 1x10 <sup>5</sup>                          | DMEM+FCS+Penstrep | 100μM | 42% | This study |
| 129 | Human                   | Zinc/time       | HeLa            | EYFP-PPR56+nad4_native                        | 14h | 1x10 <sup>5</sup>                          | DMEM+FCS+Penstrep | 100μM | 27% | This study |
| 130 | Human                   | Zinc/time       | HeLa            | EYFP-PPR56+nad4_native                        | 20h | 1x10 <sup>5</sup>                          | DMEM+FCS+Penstrep | 100μM | 51% | This study |
| 131 | Human                   | Zinc/time       | HeLa            | EYFP-PPR56+nad4_native                        | 20h | 1x10 <sup>5</sup>                          | DMEM+FCS+Penstrep | 100μM | 44% | This study |
| 132 | Human                   | Zinc/time       | HeLa            | EYFP-PPR56+nad4_native                        | 20h | 1x10 <sup>5</sup>                          | DMEM+FCS+Penstrep | 100μM | 39% | This study |
| 133 | Human                   | Zinc/time       | HeLa            | EYFP-PPR56+nad4_native                        | 40h | 1x10 <sup>5</sup>                          | DMEM+FCS+Penstrep | 100μM | 45% | This study |
| 134 | Human                   | Zinc/time       | HeLa            | EYFP-PPR56+nad4_native                        | 40h | 1x10 <sup>5</sup>                          | DMEM+FCS+Penstrep | 100μM | 47% | This study |
| 135 | Human                   | Zinc/time       | HeLa            | EYFP-PPR56+nad4_native                        | 40h | 1x10 <sup>5</sup>                          | DMEM+FCS+Penstrep | 100μM | 42% | This study |
| 136 | Human                   | Zinc/time       | HeLa            | EYFP-PPR56+nad4_native                        | 14h | 1x10 <sup>5</sup>                          | DMEM+FCS+Penstrep | 25μM  | 40% | This study |
| 137 | Human                   | Zinc/time       | HeLa            | EYFP-PPR56+nad4_native                        | 14h | 1x10 <sup>5</sup>                          | DMEM+FCS+Penstrep | 25μM  | 36% | This study |
| 138 | Human                   | Zinc/time       | HeLa            | EYFP-PPR56+nad4_native                        | 14h | 1x10 <sup>5</sup>                          | DMEM+FCS+Penstrep | 25μM  | 29% | This study |
| 139 | Human                   | Zinc/time       | HeLa            | EYFP-PPR56+nad4_native                        | 20h | 1x10 <sup>5</sup>                          | DMEM+FCS+Penstrep | 25μM  | 45% | This study |
| 140 | Human                   | Zinc/time       | HeLa            | EYFP-PPR56+nad4_native                        | 20h | 1x10 <sup>5</sup>                          | DMEM+FCS+Penstrep | 25μM  | 45% | This study |
| 141 | Human                   | Zinc/time       | HeLa            | EYFP-PPR56+nad4_native                        | 20h | 1x10 <sup>5</sup>                          | DMEM+FCS+Penstrep | 25μM  | 32% | This study |
| 142 | Human                   | Zinc/time       | HeLa            | EYFP-PPR56+nad4_native                        | 40h | 1x10 <sup>5</sup>                          | DMEM+FCS+Penstrep | 25μM  | 49% | This study |
| 143 | Human                   | Zinc/time       | HeLa            | EYFP-PPR56+nad4_native                        | 40h | 1x10 <sup>5</sup>                          | DMEM+FCS+Penstrep | 25μM  | 46% | This study |
| 144 | Human                   | Zinc/time       | HeLa            | EYFP-PPR56+nad4_native                        | 40h | 1x10 <sup>5</sup>                          | DMEM+FCS+Penstrep | 25μM  | 47% | This study |
| 145 | Human                   | Zinc/time       | HeLa            | EYFP-PPR56+nad4_native                        | 14h | 1x10 <sup>5</sup>                          | DMEM+FCS+Penstrep | no    | 42% | This study |
| 146 | Human                   | Zinc/time       | HeLa            | EYFP-PPR56+nad4_native                        | 14h | 1x10 <sup>5</sup>                          | DMEM+FCS+Penstrep | no    | 30% | This study |
| 147 | Human                   | Zinc/time       | HeLa            | EYFP-PPR56+nad4_native                        | 14h | 1x10 <sup>5</sup>                          | DMEM+FCS+Penstrep | no    | 35% | This study |
| 148 | Human                   | Zinc/time       | HeLa            | EYFP-PPR56+nad4_native                        | 20h | 1x10 <sup>5</sup>                          | DMEM+FCS+Penstrep | no    | 43% | This study |
| 149 | Human                   | Zinc/time       | HeLa            | EYFP-PPR56+nad4_native                        | 20h | 1x10 <sup>5</sup>                          | DMEM+FCS+Penstrep | no    | 54% | This study |
| 150 | Human                   | Zinc/time       | HeLa            | EYFP-PPR56+nad4_native                        | 20h | 1x10 <sup>5</sup>                          | DMEM+FCS+Penstrep | no    | 36% | This study |
| 151 | Human                   | Zinc/time       | HeLa            | EYFP-PPR56+nad4_native                        | 40h | 1x10 <sup>5</sup>                          | DMEM+FCS+Penstrep | no    | 48% | This study |
| 152 | Human                   | Zinc/time       | HeLa            | EYFP-PPR56+nad4_native                        | 40h | 1x10 <sup>5</sup>                          | DMEM+FCS+Penstrep | no    | 62% | This study |
| 153 | Human                   | Zinc/time       | HeLa            | EYFP-PPR56+nad4_native                        | 40h | 1x10 <sup>5</sup>                          | DMEM+FCS+Penstrep | no    | 50% | This study |
| 154 | <i>Escherichia coli</i> | S motif mutants | Rosetta 2 (DE3) | His <sub>6</sub> -MBP-PPR56_S4mut+nad4_native | 20h | 3.2x10 <sup>8</sup> to 4.6x10 <sup>8</sup> | LB+KanCam         | 0.4mM | 98% | This study |
| 155 | <i>Escherichia coli</i> | S motif mutants | Rosetta 2 (DE3) | His <sub>6</sub> -MBP-PPR56_S4mut+nad4_native | 20h | 3.2x10 <sup>8</sup> to 4.6x10 <sup>8</sup> | LB+KanCam         | 0.4mM | 98% | This study |
| 156 | <i>Escherichia coli</i> | S motif mutants | Rosetta 2 (DE3) | His <sub>6</sub> -MBP-PPR56_S4mut+nad4_native | 20h | 3.2x10 <sup>8</sup> to 4.6x10 <sup>8</sup> | LB+KanCam         | 0.4mM | 81% | This study |
| 157 | <i>Escherichia coli</i> | S motif mutants | Rosetta 2 (DE3) | His <sub>6</sub> -MBP-PPR56_S7mut+nad4_native | 20h | 3.2x10 <sup>8</sup> to 4.6x10 <sup>8</sup> | LB+KanCam         | 0.4mM | 0%  | This study |
| 158 | <i>Escherichia coli</i> | S motif mutants | Rosetta 2 (DE3) | His <sub>6</sub> -MBP-PPR56_S7mut+nad4_native | 20h | 3.2x10 <sup>8</sup> to 4.6x10 <sup>8</sup> | LB+KanCam         | 0.4mM | 0%  | This study |
| 159 | <i>Escherichia coli</i> | S motif mutants | Rosetta 2 (DE3) | His <sub>6</sub> -MBP-PPR56_S7mut+nad4_native | 20h | 3.2x10 <sup>8</sup> to 4.6x10 <sup>8</sup> | LB+KanCam         | 0.4mM | 0%  | This study |
| 160 | <i>Escherichia coli</i> | S motif mutants | Rosetta 2 (DE3) | His <sub>6</sub> -MBP-PPR56_S7mut+nad4_-10ga  | 20h | 3.2x10 <sup>8</sup> to 4.6x10 <sup>8</sup> | LB+KanCam         | 0.4mM | 0%  | This study |



|     |                         |                    |                 |                                                 |     |                                            |           |       |        |            |
|-----|-------------------------|--------------------|-----------------|-------------------------------------------------|-----|--------------------------------------------|-----------|-------|--------|------------|
| 161 | <i>Escherichia coli</i> | S motif mutants    | Rosetta 2 (DE3) | His <sub>6</sub> -MBP-PPR56_S7mut+nad4_-10ga    | 20h | 3.2x10 <sup>8</sup> to 4.6x10 <sup>8</sup> | LB+KanCam | 0.4mM | 0%     | This study |
| 162 | <i>Escherichia coli</i> | S motif mutants    | Rosetta 2 (DE3) | His <sub>6</sub> -MBP-PPR56_S7mut+nad4_-10ga    | 20h | 3.2x10 <sup>8</sup> to 4.6x10 <sup>8</sup> | LB+KanCam | 0.4mM | 0%     | This study |
| 163 | <i>Escherichia coli</i> | S motif mutants    | Rosetta 2 (DE3) | His <sub>6</sub> -MBP-PPR56_S4mut+nad4_-7ag     | 20h | 3.2x10 <sup>8</sup> to 4.6x10 <sup>8</sup> | LB+KanCam | 0.4mM | 100%   | This study |
| 164 | <i>Escherichia coli</i> | S motif mutants    | Rosetta 2 (DE3) | His <sub>6</sub> -MBP-PPR56_S4mut+nad4_-7ag     | 20h | 3.2x10 <sup>8</sup> to 4.6x10 <sup>8</sup> | LB+KanCam | 0.4mM | 100%   | This study |
| 165 | <i>Escherichia coli</i> | S motif mutants    | Rosetta 2 (DE3) | His <sub>6</sub> -MBP-PPR56_S4mut+nad4_-7ag     | 20h | 3.2x10 <sup>8</sup> to 4.6x10 <sup>8</sup> | LB+KanCam | 0.4mM | 98%    | This study |
| 166 | <i>Escherichia coli</i> | DYW domain mutants | Rosetta 2 (DE3) | His <sub>6</sub> -MBP-PPR56_HSERLA+nad4_native  | 20h | 3.2x10 <sup>8</sup> to 4.6x10 <sup>8</sup> | LB+KanCam | 0.4mM | 79%    | This study |
| 167 | <i>Escherichia coli</i> | DYW domain mutants | Rosetta 2 (DE3) | His <sub>6</sub> -MBP-PPR56_HSERLA+nad4_native  | 20h | 3.2x10 <sup>8</sup> to 4.6x10 <sup>8</sup> | LB+KanCam | 0.4mM | 80%    | This study |
| 168 | <i>Escherichia coli</i> | DYW domain mutants | Rosetta 2 (DE3) | His <sub>6</sub> -MBP-PPR56_HSERLA+nad4_native  | 20h | 3.2x10 <sup>8</sup> to 4.6x10 <sup>8</sup> | LB+KanCam | 0.4mM | 78%    | This study |
| 169 | <i>Escherichia coli</i> | DYW domain mutants | Rosetta 2 (DE3) | His <sub>6</sub> -MBP-PPR56_CxDAH+nad4_native   | 20h | 3.2x10 <sup>8</sup> to 4.6x10 <sup>8</sup> | LB+KanCam | 0.4mM | 0%     | This study |
| 170 | <i>Escherichia coli</i> | DYW domain mutants | Rosetta 2 (DE3) | His <sub>6</sub> -MBP-PPR56_CxDAH+nad4_native   | 20h | 3.2x10 <sup>8</sup> to 4.6x10 <sup>8</sup> | LB+KanCam | 0.4mM | 0%     | This study |
| 171 | <i>Escherichia coli</i> | DYW domain mutants | Rosetta 2 (DE3) | His <sub>6</sub> -MBP-PPR56_CxDAH+nad4_native   | 20h | 3.2x10 <sup>8</sup> to 4.6x10 <sup>8</sup> | LB+KanCam | 0.4mM | 0%     | This study |
| 172 | <i>Escherichia coli</i> | DYW domain mutants | Rosetta 2 (DE3) | His <sub>6</sub> -MBP-PPR56+nad4_native         | 20h | 3.2x10 <sup>8</sup> to 4.6x10 <sup>8</sup> | LB+KanCam | 0.4mM | 100±0% | (3)        |
| 173 | <i>Escherichia coli</i> | DYW domain mutants | Rosetta 2 (DE3) | His <sub>6</sub> -MBP-PPR65+ccmFC_native        | 20h | 3.2x10 <sup>8</sup> to 4.6x10 <sup>8</sup> | LB+KanCam | 0.4mM | 96±4%  | (3)        |
| 174 | <i>Escherichia coli</i> | DYW domain mutants | Rosetta 2 (DE3) | His <sub>6</sub> -MBP-PPR65_HSARLA+ccmFC_native | 20h | 3.2x10 <sup>8</sup> to 4.6x10 <sup>8</sup> | LB+KanCam | 0.4mM | 0±0%   | (3)        |
| 175 | <i>Escherichia coli</i> | DYW domain mutants | Rosetta 2 (DE3) | His <sub>6</sub> -MBP-PPR65_CxDAH+ccmFC_native  | 20h | 3.2x10 <sup>8</sup> to 4.6x10 <sup>8</sup> | LB+KanCam | 0.4mM | 0±0%   | (3)        |

### Supplementary Table S3

**Transfected human IMR-90 cell lines sent for RNA sequencing.** The following information is included: cell line, RNASeq batch, expressed fusion protein, delivered target, replicate number of respective constructs, FACS sorting prior to RNA preparation, amounts of raw reads, reads left for mapping after quality trimming and numbers of removed plasmid matching reads (in brackets are percentages of mapped reads to EYFP-plasmid vs. HA-His<sub>6</sub>-MBP-PPR65 plasmid for co-transfected cells), editing efficiencies of the respective delivered targets (%editing) and the fraction of off-targets, which are confirmed in the individual replicates. The corresponding SRA data is deposited within BioProject PRJNA832818.

| Name  | Cell line | RNASeq batch | Expressed protein                                       | Delivered target | Replicate     | FACS sorted | Raw reads | After quality trimming<br>> % of raw reads | Matching plasmid<br>> % of clean reads | Reads for mapping | %editing<br>> delivered target | Off-targets confirmed |
|-------|-----------|--------------|---------------------------------------------------------|------------------|---------------|-------------|-----------|--------------------------------------------|----------------------------------------|-------------------|--------------------------------|-----------------------|
| IMR1  | IMR-90    | 2            | EYFP-PPR56                                              | nad4             | 1             | Yes         | 99106154  | 87380226 (88.2%)                           | 32.4%                                  | 59007884          | 71%                            | 727/906 (80.2%)       |
| IMR2  | IMR-90    | 1            | EYFP-PPR56                                              | nad4             | 2             | Yes         | 117428040 | 101532360 (86.5%)                          | 27.2%                                  | 73903770          | 71%                            | 839/906 (92.6%)       |
| IMR3  | IMR-90    | 1            | EYFP-PPR56                                              | nad4             | 3             | Yes         | 110474636 | 95441720 (86.4%)                           | 28.4%                                  | 68253350          | 70%                            | 814/906 (89.8%)       |
| ELIM1 | IMR-90    | 2            | EYFP-PPR56                                              | nad4             | 4             | No          | 115482810 | 103838880 (89.9%)                          | 26.1%                                  | 76716486          | 72%                            | 533/906 (58.8%)       |
| IMR5  | IMR-90    | 1            | EYFP-PPR56-CxDAH                                        | nad4             | 1             | Yes         | 124316786 | 107041332 (86.1%)                          | 27.0%                                  | 78065000          | 0%                             | /                     |
| I-1-2 | IMR-90    | 3            | EYFP-PPR56_S4TN>TD                                      | nad4             | 1             | Yes         | 128657316 | 115191558 (89.5%)                          | 38.3%                                  | 70994072          | 27%                            | 2063/2265 (91.1%)     |
| I-3   | IMR-90    | 3            | EYFP-PPR56_S4TN>TD                                      | nad4-7AG         | 2             | Yes         | 112121016 | 100559526 (89.7%)                          | 37.4%                                  | 62881814          | 65%                            | 1987/2265 (87.7%)     |
| I-4   | IMR-90    | 3            | EYFP-PPR56_S4TN>TD                                      | nad4-7AG         | 3             | Yes         | 122435238 | 108661546 (88.8%)                          | 38.5%                                  | 66747124          | 64%                            | 2028/2265 (89.5%)     |
| I-6-2 | IMR-90    | 3            | EYFP-PPR56_S7TD>TN                                      | nad4             | 1             | Yes         | 126830966 | 113777666 (89.7%)                          | 39.2%                                  | 69104234          | 5%                             | 284/323 (87.9%)       |
| I-7   | IMR-90    | 3            | EYFP-PPR56_S7TD>TN                                      | nad4-10GA        | 2             | Yes         | 104658340 | 93086300 (88.9%)                           | 44.6%                                  | 51480558          | 53%                            | 261/323 (80.8%)       |
| I-8   | IMR-90    | 3            | EYFP-PPR56_S7TD>TN                                      | nad4-10GA        | 3             | Yes         | 133100572 | 118817108 (89.3%)                          | 44.4%                                  | 65931130          | 50%                            | 290/323 (89.8%)       |
| I-9   | IMR-90    | 3            | EYFP + HA-His <sub>6</sub> -MBP-PPR65 (co-transfection) | ccmFC            | 1             | Yes         | 249859798 | 221774196 (88.8%)                          | 30.1%<br>(5.6%/ 24.5%)                 | 154861296         | 19%                            | 4/7 (57.1%)           |
| I-10  | IMR-90    | 3            | EYFP + HA-His <sub>6</sub> -MBP-PPR65 (co-transfection) | ccmFC            | 2             | Yes         | 274709688 | 242595378 (88.3%)                          | 30.5%<br>(4.9%/ 25.6%)                 | 168492352         | 20%                            | 7/7 (100%)            |
| I-12  | IMR-90    | 3            | EYFP + HA-His <sub>6</sub> -MBP-PPR65 (co-transfection) | ccmFC            | 3             | Yes         | 255509484 | 225227710 (88.2%)                          | 30.6%<br>(6.5%/ 24.1%)                 | 156244988         | 20%                            | 5/7 (71.4%)           |
| IMR8  | IMR-90    | 1            | EYFP                                                    | none             | Control PPR56 | Yes         | 110753644 | 98081586 (88.6%)                           | 19.4%                                  | 78948974          | no PPR/ target                 | /                     |
| I-13  | IMR-90    | 3            | EYFP + HA-His <sub>6</sub> -MBP (co-transfection)       | none             | Control PPR65 | Yes         | 139760184 | 124347896 (89.0%)                          | 25.0%<br>(5.5%/ 19.5%)                 | 93136262          | no PPR/ target                 | /                     |



|                                                    |   |     |     |     |     |    |     |     |     |     |     |     |     |   |   |   |   |   |   |   |   |   |   |   |   |   |   |   |   |   |   |   |   |   |   |   |   |   |   |   |   |     |     |     |     |     |     |     |     |     |     |
|----------------------------------------------------|---|-----|-----|-----|-----|----|-----|-----|-----|-----|-----|-----|-----|---|---|---|---|---|---|---|---|---|---|---|---|---|---|---|---|---|---|---|---|---|---|---|---|---|---|---|---|-----|-----|-----|-----|-----|-----|-----|-----|-----|-----|
| ARNT-NM_001197325.2eU1108-NP_001184254.1aa3597T    | 3 | 9%  | 4%  | 9%  | 6%  | 0  | 0   | 290 | 160 | 780 | 230 | 400 | T   | C | T | C | C | G | A | C | A | C | A | C | A | C | A | T | T | G | A | G | G | T | A | T | C | T | T | C | A | G   | T   | T   | T   | T   | G   | 13% | 5%  | 10% |     |
| ASAH2B-NM_001079516.4eU550-NP_001072984.1aa158PL   | 4 | 49% | 28% | 61% | 17% | 0  | 1   | 7%  | 260 | 300 | 690 | 430 | 160 | C | T | G | T | C | A | T | A | C | T | T | T | C | A | T | T | T | G | A | A | G | G | C | A | G | T | C | C | C   | G   | G   | C   | T   | 72% | 70% | 41% | 13% | 7%  |
| ASB16-NM_0008663.5eU1914-3UTR+466                  | 2 | 22% | 11% | 30% | 0   | 0  | 3   | 25% | 220 | 110 | 490 | 200 | 200 | G | G | C | T | C | T | T | G | A | G | A | C | C | T | G | C | T | G | A | C | T | T | C | C | C | G | G | A | C   | T   | 23% | 29% | 23% |     |     |     |     |     |
| ASCC3-NM_0006828.4eU6781-NP_006619.2aa2157YY       | 4 | 5%  | 1%  | 4%  | 1%  | 0  | 0   | 520 | 230 | 680 | 330 | 180 | A   | C | C | T | T | C | T | T | G | A | A | T | A | C | C | T | G | G | A | A | G | G | T | A | T | T | C | T | C | A   | G   | A   | C   | 5%  | 3%  | 5%  | 6%  |     |     |
| ASH1L-NM_001396177.2eU4968-NP_001353106.1aa1406PP  | 3 | 16% | 4%  | 19% | 4%  | 0  | 0   | 210 | 360 | 800 | 260 | 380 | A   | G | A | T | T | A | G | G | T | T | A | C | T | A | T | G | A | A | G | A | G | A | G | A | G | A | G | A | G | A   | G   | A   | G   | 22% | 16% | 14% |     |     |     |
| ASXL2-NM_001369346.1eU3253-NP_001356275.1aa1044TI  | 2 | 8%  | 4%  | 8%  | 4%  | 0  | 0   | 260 | 130 | 610 | 290 | 300 | A   | C | T | C | A | G | T | T | T | C | C | A | G | A | G | C | T | G | C | C | A | A | A | A | A | A | A | A | A | A   | A   | A   | 5%  | 10% |     |     |     |     |     |
| ATG101-NM_001098673.2eU437-NP_001092143.1aa146SF   | 2 | 2%  | 1%  | 2%  | 1%  | 0  | 0   | 350 | 240 | 740 | 400 | 180 | A   | G | T | C | C | A | C | T | T | C | A | A | G | A | G | A | G | A | A | A | A | A | A | A | A | A | A | A | A | A   | A   | A   | 1%  | 2%  |     |     |     |     |     |
| ATC14-NM_014924.5eU096-NP_055793.2aa326PP          | 4 | 2%  | 14% | 34% | 11% | 0  | 0   | 300 | 230 | 540 | 490 | 370 | T   | G | T | T | C | T | C | A | T | A | T | A | C | T | T | G | A | T | G | A | A | A | A | A | A | A | A | A | A | A   | A   | 45% | 24% | 32% | 12% | 7%  | 6%  |     |     |
| ATC-NM_004044.7eU625-NP_004035.2aa181HY            | 3 | 2%  | 1%  | 2%  | 1%  | 0  | 0   | 220 | 280 | 770 | 150 | 300 | A   | G | C | G | C | C | A | T | T | A | G | C | T | T | G | A | G | A | G | A | G | A | G | A | G | A | G | A | G | A   | G   | A   | 2%  | 2%  | 3%  |     |     |     |     |
| ATP13A3-NM_001367549.1eU1382-NP_001354478.1aa286SF | 3 | 6%  | 4%  | 10% | 3%  | 0  | 0   | 380 | 260 | 730 | 260 | 310 | G   | A | G | T | A | A | T | G | A | A | G | A | A | A | A | A | A | A | A | A | A | A | A | A | A | A | A | A | A | A   | A   | A   | 2%  | 2%  |     |     |     |     |     |
| ATP5F1A-NM_001001935.3eU1572-NP_001001935.1aa428PP | 4 | 2%  | 1%  | 2%  | 1%  | 3% | 28% | 3%  | 190 | 380 | 620 | 330 | 440 | T | G | A | T | T | G | C | T | G | A | G | A | A | A | A | A | A | A | A | A | A | A | A | A | A | A | A | A | A   | A   | 2%  | 2%  |     |     |     |     |     |     |
| ATP5P0-NM_001697.3eU505-NP_001688.1aa155SF         | 4 | 8%  | 4%  | 10% | 1%  | 0  | 0   | 380 | 200 | 720 | 210 | 290 | C   | T | G | C | T | C | T | T | T | T | G | A | A | A | A | A | A | A | A | A | A | A | A | A | A | A | A | A | A | A   | A   | 11% | 10% | 2%  | 24% | 30% | 29% |     |     |
| ATP6V1D-NM_015994.4eU309-NP_057078.1aa68SL         | 4 | 8%  | 3%  | 9%  | 1%  | 0  | 3   | 70% | 480 | 210 | 700 | 270 | 300 | T | G | C | G | C | A | T | T | T | T | T | T | T | T | T | T | T | T | T | T | T | T | T | T | T | T | T | T | T   | T   | T   | 10% | 9%  | 8%  | 3%  | 70% | 71% | 69% |
| ATPSCKMT-NM_199133.4eU470-NP_954584.2aa152SL       | 3 | 10% | 0%  | 10% | 0%  | 0  | 0   | 570 | 230 | 820 | 550 | 320 | A   | T | T | T | C | A | G | T | T | T | T | T | T | T | T | T | T | T | T | T | T | T | T | T | T | T | T | T | T | T   | T   | 10% | 10% | 10% |     |     |     |     |     |
| ATRX-NM_000489.6eU10170-3UTR+2476                  | 3 | 10% | 4%  | 10% | 4%  | 0  | 0   | 390 | 220 | 820 | 410 | 180 | T   | A | A | G | T | A | C | T | T | T | T | T | T | T | T | T | T | T | T | T | T | T | T | T | T | T | T | T | T | T   | T   | 8%  | 15% | 10% |     |     |     |     |     |
| ATXN3-NM_001127696.2eU1694-3UTR+623                | 3 | 27% | 11% | 27% | 11% | 0  | 1   | 9%  | 430 | 170 | 550 | 510 | 230 | C | A | C | A | A | T | T | T | T | T | T | T | T | T | T | T | T | T | T | T | T | T | T | T | T | T | T | T | T   | T   | 22% | 40% | 20% | 9%  |     |     |     |     |
| AVL9-NM_015060.3eU686-NP_055875.1aa149Q*           | 4 | 23% | 0%  | 27% | 3%  | 0  | 0   | 220 | 420 | 780 | 450 | 470 | C   | A | T | C | A | T | T | T | T | T | T | T | T | T | T | T | T | T | T | T | T | T | T | T | T | T | T | T | T | T   | T   | 3%  | 19% | 2%  | 20% | 16% |     |     |     |
| B3GALT9-NM_001386823.1eU841-NP_001373752.1aa68SS   | 3 | 28% | 0%  | 32% | 6%  | 0  | 0   | 340 | 260 | 740 | 470 | 150 | G   | A | C | T | C | G | A | C | C | C | C | T | A | A | G | A | G | A | G | A | G | A | G | A | G | A | G | A | G | A   | G   | A   | 26% | 38% | 19% |     |     |     |     |
| BAD-NM_004322.3eU727-NP_004313.1aa131RC            | 4 | 5%  | 2%  | 6%  | 1%  | 0  | 0   | 510 | 270 | 730 | 370 | 240 | T   | T | T | T | T | T | T | T | T | T | T | T | T | T | T | T | T | T | T | T | T | T | T | T | T | T | T | T | T | T   | T   | 7%  | 7%  | 5%  | 2%  |     |     |     |     |
| BANF1-NM_001143985.1eU464-NP_001137457.1aa5Q*      | 4 | 12% | 6%  | 14% | 2%  | 0  | 1   | 2%  | 200 | 320 | 740 | 220 | 370 | A | A | G | A | T | T | A | A | G | C | T | G | A | T | C | A | A | A | A | A | A | A | A | A | A | A | A | A | A   | A   | A   | A   | 15% | 16% | 12% | 4%  | 2%  |     |
| BANF1-NM_003860.4eU97-NP_003851.1aa5Q*             | 4 | 12% | 6%  | 14% | 1%  | 0  | 1   | 1%  | 200 | 320 | 740 | 220 | 370 | G | A | T | T | A | A | G | C | T | G | A | T | C | A | A | A | A | A | A | A | A | A | A | A | A | A | A | A | A   | A   | 16% | 13% | 14% | 5%  |     |     |     |     |
| BANF1-XM_017018514.1eU514-XP_016874003.1aa5Q*      | 3 | 15% | 5%  | 15% | 5%  | 0  | 0   | 200 | 320 | 740 | 220 | 370 | A   | A | T | T | A | A | G | C | T | G | A | T | C | A | A | A | A | A | A | A | A | A | A | A | A | A | A | A | A | A   | A   | 19% | 16% | 10% | 1%  |     |     |     |     |
| BAX-NM_001291429.2eU1107-3UTR+448                  | 2 | 2%  | 0%  | 2%  | 0%  | 0  | 0   | 200 | 350 | 710 | 200 | 330 | A   | G | T | C | C | T | G | T | C | T | C | A | G | A | G | A | G | A | G | A | G | A | G | A | G | A | G | A | G | A   | G   | A   | 2%  | 2%  |     |     |     |     |     |
| BBX-NM_001142568.3eU2664-NP_001136040.1aa788SL     | 4 | 15% | 8%  | 16% | 9%  | 0  | 0   | 430 | 210 | 830 | 220 | 230 | A   | T | G | C | A | T | T | C | A | C | C | T | A | C | A | G | A | G | A | G | A | G | A | G | A | G | A | G | A | G   | A   | G   | 27% | 12% | 9%  | 11% |     |     |     |
| BBX-NM_0020235.7eU2574-NP_064620.2aa758SL          | 4 | 14% | 7%  | 15% | 8%  | 0  | 0   | 430 | 210 | 830 | 220 | 230 | A   | T | G | C | A | T | T | C | A | C | C | T | A | C | A | G | A | G | A | G | A | G | A | G | A | G | A | G | A | G   | A   | G   | 24% | 9%  | 13% | 11% |     |     |     |
| BCAR1-NM_001170714.3eU868-NP_001164185.1aa195SL    | 3 | 3%  | 1%  | 3%  | 1%  | 3% | 28% | 8%  | 280 | 240 | 550 | 350 | 180 | C | T | C | C | C | C | A | G | C | C | A | A | G | A | G | A | C | A | C | C | C | T | T | T | T | T | T | T | T   | T   | 2%  | 4%  | 3%  | 25% | 37% | 22% |     |     |
| BCAS2-NM_005872.3eU792-3UTR+90                     | 4 | 5%  | 2%  | 6%  | 1%  | 3% | 17% | 4%  | 300 | 360 | 700 | 320 | 250 | A | A | T | T | T | T | T | T | T | T | T | T | T | T | T | T | T | T | T | T | T | T | T | T | T | T | T | T | T   | 5%  | 7%  | 5%  | 2%  |     |     |     |     |     |
| BCL2L12-NM_001040668.1eU1096-NP_001035758.1aa138PP | 4 | 4%  | 1%  | 4%  | 2%  | 0  | 3   | 60% | 290 | 220 | 700 | 240 | 350 | T | T | C | T | T | T | T | T | T | T | T | T | T | T | T | T | T | T | T | T | T | T | T | T | T | T | T | T | T   | 6%  | 3%  | 4%  | 3%  |     |     |     |     |     |
| BCL2L12-NM_001282515.1eU1099-NP_001269445.1aa139PP | 3 | 5%  | 1%  | 5%  | 1%  | 0  | 3   | 64% | 290 | 220 | 700 | 240 | 350 | T | T | C | T | T | T | T | T | T | T | T | T | T | T | T | T | T | T | T | T | T | T | T | T | T | T | T | T | T   | 6%  | 3%  | 4%  | 3%  |     |     |     |     |     |
| BCOR-NM_001123385.2eU792-NP_00116857.1aa33SL       | 3 | 26% | 15% | 26% | 15% | 0  | 0   | 210 | 120 | 790 | 120 | 440 | A   | G | T | C | C | A | T | T | T | T | T | T | T | T | T | T | T | T | T | T | T | T | T | T | T | T | T | T | T | T   | 43% | 15% | 19% |     |     |     |     |     |     |
| BIRC2-NM_001166.5eU1932-NP_001157.1aa171SL         | 4 | 5%  | 1%  | 6%  | 1%  | 0  | 0   | 390 | 140 | 780 | 250 | 150 | T   | A | T | T | T | T | T | T | T | T | T | T | T | T | T | T | T | T | T | T | T | T | T | T | T | T | T | T | T | T   | 5%  | 6%  | 5%  | 4%  |     |     |     |     |     |
| BLMH-NM_000386.4eU1294-NP_000377.1aa390TI          | 4 | 10% | 4%  | 12% | 2%  | 0  | 3   | 63% | 300 | 270 | 640 | 380 | 310 | C | A | G | A | A | G | A | G | A | T | G | A | T | C | A | A | A | A | A | A | A | A | A | A | A | A | A | A | A   | A   | 14% | 9%  | 12% | 5%  |     |     |     |     |
| BMP1-NM_006129.5eU3253-3UTR+258                    | 4 | 3%  | 1%  | 3%  | 1%  | 0  | 0   | 320 | 280 | 680 | 220 | 110 | C   | T | C | C | A | A | G | A | G | A | C | A | T | T | T | T | T | T | T | T | T | T | T | T | T | T | T | T | T | T   | 4%  | 5%  | 2%  | 3%  |     |     |     |     |     |
| BNIP3-NM_004052.4eU1380-3UTR+678                   | 4 | 38% | 10% | 43% | 5%  | 0  | 3   | 7%  | 270 | 170 | 830 | 190 | 100 | A | T | G | A | T | C | A | G | T | T | T | T | T | T | T | T | T | T | T | T | T | T | T | T | T | T | T | T | 48% | 38% | 42% | 26% | 4%  |     |     |     |     |     |





|                                                    |   |     |      |     |    |   |     |     |     |     |     |     |   |   |   |   |   |   |   |   |   |   |   |   |   |   |   |   |   |   |   |   |   |   |   |   |   |   |   |     |     |     |     |     |     |     |    |
|----------------------------------------------------|---|-----|------|-----|----|---|-----|-----|-----|-----|-----|-----|---|---|---|---|---|---|---|---|---|---|---|---|---|---|---|---|---|---|---|---|---|---|---|---|---|---|---|-----|-----|-----|-----|-----|-----|-----|----|
| EGFR-NM_001346897.2eU408-NP_00133326.1aa49LL       | 4 | 20% | 11%  | 24% | 9% | 0 | 0   | 390 | 210 | 650 | 420 | 350 | G | C | A | G | T | T | G | G | G | C | A | C | T | T | T | G | A | A | G | A | T | T | C | T | C | T | A | G   | C   | C   | T   | 33% | 24% | 15% | 9% |
| EID2-NM_153232.4eU747-NP_694964.3aa222PL           | 2 | 4%  | 2%   | 4%  | 2% | 0 | 0   | 250 | 150 | 650 | 180 | 230 | T | A | G | C | T | C | T | G | A | C | T | G | C | T | C | T | G | A | A | G | T | T | A | C | A | A | C | C   | T   | 2%  | 5%  |     |     |     |    |
| EIF1AD-NM_001242461.2eU571-NP_001229410.1aa69LL    | 2 | 5%  | 1%   | 6%  | 0% | 0 | 0   | 440 | 260 | 800 | 350 | 440 | G | A | A | C | A | C | T | C | T | G | G | A | T | C | A | A | G | A | G | G | G | G | G | G | G | G | G | G   | G   | 6%  | 6%  | 4%  |     |     |    |
| EIF2AK2-NM_001135651.3eU1767-NP_00129123.1aa504SL  | 4 | 21% | 9%   | 26% | 1% | 0 | 3   | 220 | 160 | 840 | 160 | 290 | T | T | T | T | T | T | T | T | T | T | T | T | T | T | T | T | T | T | T | T | T | T | T | T | T | T | T | 26% | 26% | 25% | 6%  |     |     |     |    |
| EIF2AK2-NM_001135651.3eU892-NP_001129123.1aa209SL  | 4 | 6%  | 3%   | 7%  | 1% | 0 | 3   | 270 | 320 | 770 | 140 | 200 | C | T | T | T | T | T | T | T | T | T | T | T | T | T | T | T | T | T | T | T | T | T | T | T | T | T | T | 7%  | 6%  | 6%  | 2%  |     |     |     |    |
| EIF2A-NM_001319043.2eU1206-NP_001305972.1aa397PL   | 4 | 4%  | 0%   | 4%  | 1% | 0 | 0   | 320 | 290 | 710 | 440 | 110 | C | T | T | T | T | T | T | T | T | T | T | T | T | T | T | T | T | T | T | T | T | T | T | T | T | T | T | 5%  | 5%  | 3%  | 2%  |     |     |     |    |
| EIF2S3-NM_001415.4eU110-NP_001406.1aa339HY         | 4 | 10% | 4%   | 12% | 1% | 0 | 2   | 310 | 130 | 720 | 300 | 250 | T | T | T | T | T | T | T | T | T | T | T | T | T | T | T | T | T | T | T | T | T | T | T | T | T | T | T | 12% | 11% | 12% | 4%  |     |     |     |    |
| EIF3J-NM_001284335.2eU1268-3UTR+605                | 3 | 2%  | 0%   | 2%  | 0% | 0 | 0   | 360 | 320 | 450 | 500 | 490 | A | A | A | A | C | T | T | T | T | T | T | T | T | T | T | T | T | T | T | T | T | T | T | T | T | T | T | 2%  | 2%  | 2%  | 1%  |     |     |     |    |
| EIF4G1-NM_001194946.2eU3101-NP_001181875.2aa981RC  | 3 | 2%  | 0%   | 2%  | 0% | 0 | 3   | 340 | 220 | 710 | 220 | 410 | A | A | A | T | C | T | T | T | T | T | T | T | T | T | T | T | T | T | T | T | T | T | T | T | T | T | T | 3%  | 48% | 2%  |     |     |     |     |    |
| EIF5A-NM_001970.5eU367-NP_001961.1aa74PL           | 3 | 2%  | 0%   | 2%  | 0% | 0 | 0   | 210 | 150 | 720 | 280 | 310 | T | A | C | T | T | T | T | T | T | T | T | T | T | T | T | T | T | T | T | T | T | T | T | T | T | T | T | 2%  | 1%  | 2%  |     |     |     |     |    |
| ELLAVL1-NM_001419.3eU543-NP_0014140.2aa127SF       | 4 | 17% | 6%   | 20% | 2% | 0 | 2   | 410 | 150 | 850 | 140 | 370 | G | A | C | C | A | G | A | G | A | G | A | C | T | A | G | A | G | A | G | A | G | A | G | A | G | A | G | A   | G   | 2%  | 2%  |     |     |     |    |
| ELL2-NM_012081.6eU1079-NP_036213.2aa317FS          | 4 | 2%  | 1%   | 2%  | 1% | 0 | 0   | 190 | 340 | 610 | 60  | 560 | G | T | A | G | T | T | T | T | T | T | T | T | T | T | T | T | T | T | T | T | T | T | T | T | T | T | T | T   | 22% | 16% | 19% | 8%  |     |     |    |
| EMC1-NM_001271427.2eU3137-3UTR+143                 | 2 | 2%  | 0%   | 2%  | 0% | 0 | 0   | 570 | 230 | 470 | 200 | 520 | A | A | A | A | G | A | G | T | T | T | T | T | T | T | T | T | T | T | T | T | T | T | T | T | T | T | T | 2%  | 2%  |     |     |     |     |     |    |
| EMP1-NM_001423.3eU1297-3UTR+634                    | 4 | 4%  | 2%   | 4%  | 2% | 0 | 1   | 700 | 210 | 620 | 520 | 240 | G | G | T | T | T | T | T | T | T | T | T | T | T | T | T | T | T | T | T | T | T | T | T | T | T | T | T | 1   | 3%  |     |     |     |     |     |    |
| ENGASE-NM_001042573.3eU196-3UTR+1843               | 2 | 32% | 8%   | 38% | 0% | 0 | 0   | 330 | 270 | 340 | 500 | 230 | A | C | T | G | A | C | T | T | T | T | T | T | T | T | T | T | T | T | T | T | T | T | T | T | T | T | T | 4%  | 3%  | 6%  | 2%  |     |     |     |    |
| EPB41L3-NM_001281533.2eU361-NP_001268462.1aa89Q*   | 4 | 7%  | 2%   | 8%  | 2% | 0 | 0   | 320 | 290 | 650 | 260 | 570 | T | A | T | C | G | C | A | A | T | T | T | T | T | T | T | T | T | T | T | T | T | T | T | T | T | T | T | T   | 3%  |     |     |     |     |     |    |
| EPS8-NM_004447.6eU348-3UTR+730                     | 4 | 4%  | 1%   | 4%  | 1% | 0 | 0   | 620 | 60  | 680 | 380 | 230 | A | A | G | C | A | A | A | T | T | T | T | T | T | T | T | T | T | T | T | T | T | T | T | T | T | T | T | 8%  | 10% | 6%  | 5%  |     |     |     |    |
| EPS8-NM_004447.6eU3450-3UTR+732                    | 4 | 7%  | 3%   | 8%  | 3% | 0 | 3   | 320 | 200 | 620 | 60  | 680 | A | G | C | A | A | A | T | T | T | T | T | T | T | T | T | T | T | T | T | T | T | T | T | T | T | T | T | 39% | 3%  |     |     |     |     |     |    |
| ERBIN-NM_001006600.3eU695-NP_001006600.1aa136Q*    | 2 | 3%  | 1%   | 3%  | 1% | 0 | 0   | 280 | 420 | 610 | 130 | 360 | C | T | A | T | T | T | T | T | T | T | T | T | T | T | T | T | T | T | T | T | T | T | T | T | T | T | T | 2%  |     |     |     |     |     |     |    |
| ERCC3-NM_000122.2eU335-NP_0001113.1aa91PL          | 2 | 2%  | 0%   | 2%  | 0% | 0 | 0   | 290 | 210 | 660 | 530 | 70  | A | T | G | C | C | A | T | T | T | T | T | T | T | T | T | T | T | T | T | T | T | T | T | T | T | T | T | 2%  |     |     |     |     |     |     |    |
| ERMAP-NM_001017922.2eU2020-3UTR+339                | 2 | 1%  | 0%   | 1%  | 0% | 0 | 0   | 350 | 210 | 790 | 260 | 360 | A | C | T | G | A | G | G | G | T | T | T | T | T | T | T | T | T | T | T | T | T | T | T | T | T | T | T | 2%  |     |     |     |     |     |     |    |
| ESF1-NM_001276380.2eU2167-NP_001263309.1aa695PL    | 4 | 16% | 3%   | 17% | 2% | 0 | 1   | 460 | 220 | 670 | 440 | 120 | C | G | T | A | A | A | A | T | T | T | T | T | T | T | T | T | T | T | T | T | T | T | T | T | T | T | T | 1   | 2%  |     |     |     |     |     |    |
| EXO5-NM_001346946.2eU1568-3UTR+17                  | 4 | 30% | 9%   | 34% | 4% | 0 | 1   | 240 | 400 | 760 | 120 | 360 | A | A | A | A | G | C | C | A | A | T | T | T | T | T | T | T | T | T | T | T | T | T | T | T | T | T | T | 8%  |     |     |     |     |     |     |    |
| EZH2-NM_001203247.2eU821-NP_001190176.1aa229SL     | 4 | 30% | 10%  | 35% | 3% | 0 | 3   | 280 | 190 | 800 | 320 | 230 | C | T | T | T | T | T | T | T | T | T | T | T | T | T | T | T | T | T | T | T | T | T | T | T | T | T | T | 3%  | 3%  | 1%  |     |     |     |     |    |
| EZH2-NM_004456.5eU821-NP_004447.2aa229SL           | 4 | 88% | 9%   | 91% | 9% | 0 | 1   | 280 | 190 | 800 | 320 | 230 | C | T | T | T | T | T | T | T | T | T | T | T | T | T | T | T | T | T | T | T | T | T | T | T | T | T | T | 1   | 50% |     |     |     |     |     |    |
| EZR-NM_00111077.2eU327-NP_001104547.1aa68Q*        | 4 | 1%  | 1%   | 2%  | 0% | 0 | 3   | 210 | 240 | 770 | 280 | 310 | T | G | G | T | G | A | G | T | T | T | T | T | T | T | T | T | T | T | T | T | T | T | T | T | T | T | T | 3   | 31% | 3%  |     |     |     |     |    |
| FAF2-NM_014613.3eU1247-NP_055428.1aa408PP          | 4 | 5%  | 3%   | 6%  | 2% | 0 | 0   | 250 | 240 | 570 | 640 | 390 | A | A | A | A | G | A | A | T | T | T | T | T | T | T | T | T | T | T | T | T | T | T | T | T | T | T | T | T   | 2%  |     |     |     |     |     |    |
| FAF2-NM_014613.3eU2540-3UTR+1179                   | 4 | 22% | 7%   | 26% | 3% | 0 | 0   | 420 | 300 | 770 | 310 | 40  | G | C | T | G | T | G | T | A | T | T | T | T | T | T | T | T | T | T | T | T | T | T | T | T | T | T | T | T   | 2%  |     |     |     |     |     |    |
| FAM111B-NM_001142703.2eU1577-NP_001136175.1aa488TI | 3 | 2%  | 0%   | 2%  | 0% | 0 | 0   | 380 | 110 | 600 | 520 | 270 | T | A | T | T | T | T | T | T | T | T | T | T | T | T | T | T | T | T | T | T | T | T | T | T | T | T | T | 2%  |     |     |     |     |     |     |    |
| FAM118B-NM_001330446.1eU255-NP_001313715.1aa24PP   | 3 | 8%  | 3%   | 8%  | 3% | 0 | 0   | 340 | 350 | 500 | 430 | 330 | T | T | T | T | T | T | T | T | T | T | T | T | T | T | T | T | T | T | T | T | T | T | T | T | T | T | T | 11% |     |     |     |     |     |     |    |
| FAM217B-NM_001190827.2eU203-5UTR-163               | 4 | 31% | 9%   | 35% | 9% | 1 | 19% | 260 | 150 | 790 | 400 | 220 | A | T | A | A | G | A | G | A | T | T | T | T | T | T | T | T | T | T | T | T | T | T | T | T | T | T | T | 4%  |     |     |     |     |     |     |    |
| FAM27B-NM_001100910.2eU1037-NP_001094380.1aa62TT   | 2 | 5%  | 2%   | 5%  | 2% | 0 | 0   | 270 | 180 | 650 | 460 | 270 | A | G | T | G | A | C | T | T | T | T | T | T | T | T | T | T | T | T | T | T | T | T | T | T | T | T | T | 6%  |     |     |     |     |     |     |    |
| FAM91A1-NM_001317917.2eU2730-NP_001304846.2aa578SL | 3 | 6%  | 1%   | 6%  | 1% | 0 | 3   | 320 | 160 | 760 | 180 | 290 | A | A | A | A | C | T | T | T | T | T | T | T | T | T | T | T | T | T | T | T | T | T | T | T | T | T | T | 5%  |     |     |     |     |     |     |    |
| FAM98B-NM_173611.4eU583-NP_075882.2aa183SL         | 2 | 2%  | 0%   | 2%  | 0% | 0 | 0   | 260 | 350 | 670 | 310 | 520 | A | G | T | G | A | T | T | T | T | T | T | T | T | T | T | T | T | T | T | T | T | T | T | T | T | T | T | 2%  |     |     |     |     |     |     |    |
| FANCA-NM_000135.4eU474-NP_0001026.2aa148LL         | 3 | 15% | 1%   | 15% | 1% | 0 | 3   | 250 | 220 | 740 | 320 | 390 | A | C | T | G | G | A | G | A | T | T | T | T | T | T | T | T | T | T | T | T | T | T | T | T | T | T | T | 39% |     |     |     |     |     |     |    |
| FASTKD2-NM_001136193.2eU1118-NP_001129665.1aa309TI | 4 | 8%  | 5%   | 9%  | 4% | 0 | 3   | 250 | 150 | 790 | 140 | 520 | A | G | C | A | G | T | T | T | T | T | T | T | T | T | T | T | T | T | T | T | T | T | T | T | T | T | T | 74% |     |     |     |     |     |     |    |
| FASTK-NM_006712.5eU626-NP_006703.1aa195PS          | 2 | 2%  | 0%   | 2%  | 0% | 0 | 0   | 260 | 250 | 700 | 400 | 100 | A | G | C | T | C | C | G | T | T | T | T | T | T | T | T | T | T | T | T | T | T | T | T | T | T | T | T | 2%  |     |     |     |     |     |     |    |
| FAT1-NM_005245.4eU9222-NP_005236.2aa3004SL         | 4 | 13% | 4%</ |     |    |   |     |     |     |     |     |     |   |   |   |   |   |   |   |   |   |   |   |   |   |   |   |   |   |   |   |   |   |   |   |   |   |   |   |     |     |     |     |     |     |     |    |





























|                                                    |   |     |     |     |     |   |     |    |   |     |     |     |     |     |   |   |   |   |   |   |   |   |   |   |   |   |   |   |   |   |   |   |   |   |   |   |   |   |   |   |   |   |     |     |     |     |     |     |     |     |     |     |     |     |
|----------------------------------------------------|---|-----|-----|-----|-----|---|-----|----|---|-----|-----|-----|-----|-----|---|---|---|---|---|---|---|---|---|---|---|---|---|---|---|---|---|---|---|---|---|---|---|---|---|---|---|---|-----|-----|-----|-----|-----|-----|-----|-----|-----|-----|-----|-----|
| NPPB-NM_002521.3eU137-NP_002512.1aa9RW             | 4 | 4%  | 1%  | 5%  | 0%  | 3 | 37% | 1% | 0 | 290 | 180 | 800 | 250 | 310 | A | G | A | G | A | C | A | T | G | G | A | T | C | C | C | C | A | G | A | C | A | G | C | A | C | T | T | C | C   | G   | G   | G   | C   | 5%  | 5%  | 5%  | 2%  | 36% | 37% | 38% |
| NRC2-NM_001921694.2eU2093-NP_001278623.1aa577PL    | 0 |     |     |     |     | 3 | 4%  | 1% | 0 | 320 | 280 | 740 | 140 | 420 | T | G | G | C | A | A | T | G | T | T | T | G | A | T | A | G | A | C | A | G | C | A | T | A | T | T | C | C | A   | C   | A   | C   | 7%  | 10% |     |     | 3%  | 5%  | 5%  |     |
| NRC1-NM_001159895.3eU1145-NP_001153467.1aa332SF    | 0 |     |     |     |     | 2 | 9%  | 2% | 0 | 370 | 400 | 760 | 170 | 310 | G | A | G | A | C | A | C | G | G | A | C | A | C | A | G | T | G | A | A | G | C | A | T | A | T | T | T | T | T   | T   | T   | T   | T   | 2%  | 2%  |     |     |     |     |     |
| NJAK2-NM_030952.3eU2390-3UTR+386                   | 0 |     |     |     |     | 3 | 6%  | 1% | 0 | 330 | 230 | 680 | 430 | 270 | A | C | T | G | T | G | T | C | T | T | A | G | A | G | A | C | A | G | C | T | C | T | T | T | T | T | T | T | T   | T   | T   | T   | 7%  | 5%  | 6%  |     |     |     |     |     |
| NUP43-NM_198887.3eU2393-3UTR+1216                  | 0 |     |     |     |     | 3 | 10% | 4% | 0 | 370 | 290 | 720 | 320 | 300 | T | T | T | T | T | T | T | T | T | T | T | T | T | T | T | T | T | T | T | T | T | T | T | T | T | T | T | T | T   | T   | T   | 12% | 6%  | 13% |     |     |     |     |     |     |
| OB1-NM_024546.4eU1989-NP_078822.3aa652Q*           | 0 |     |     |     |     | 3 | 18% | 3% | 3 | 380 | 240 | 740 | 350 | 440 | C | C | A | G | C | T | G | T | G | T | T | T | T | T | T | T | T | T | T | T | T | T | T | T | T | T | T | T | T   | T   | T   | 14% | 20% | 20% | 15% | 23% | 20% |     |     |     |
| OSBPL2-NM_001278649.3eU1600-3UTR+61                | 0 |     |     |     |     | 3 | 12% | 4% | 0 | 380 | 280 | 780 | 140 | 460 | A | C | A | G | A | C | T | G | A | G | T | C | G | C | A | G | A | T | A | G | C | A | T | C | A | T | C | T | C   | A   | T   | 11% | 17% | 9%  |     |     |     |     |     |     |
| OSBPL9-NM_001350208.2eU225-5UTR-538                | 3 | 4%  | 2%  | 5%  | 1%  | 3 | 44% | 4% | 0 | 290 | 160 | 810 | 190 | 280 | G | T | A | T | A | G | C | G | A | T | A | G | A | G | A | C | A | G | C | T | C | A | A | T | A | A | A | A | A   | A   | A   | 5%  | 4%  |     | 2%  | 40% | 46% | 47% |     |     |
| OTUD7B-NM_020205.4eU2588-NP_064590.2aa748SF        | 0 |     |     |     |     | 2 | 6%  | 1% | 0 | 510 | 150 | 680 | 270 | 230 | A | C | C | C | T | A | G | C | C | C | C | A | G | A | G | A | C | A | G | C | A | T | C | T | T | T | T | T | T   | T   | T   | 5%  | 7%  |     |     |     |     |     |     |     |
| PABPC4-NM_001324436.2eU1785-NP_001129125.1aa316PS  | 0 |     |     |     |     | 3 | 4%  | 1% | 0 | 400 | 350 | 810 | 460 | 400 | G | A | T | G | A | G | A | T | A | A | T | T | A | A | G | A | A | A | A | A | A | A | A | A | A | A | A | A | A   | A   | A   | A   | 4%  | 6%  | 3%  |     |     |     |     |     |
| PAPOLG-NM_022894.4eU3708-3UTR+1286                 | 0 |     |     |     |     | 2 | 44% | 8% | 0 | 430 | 220 | 840 | 220 | 280 | T | T | T | T | T | T | T | T | T | T | T | T | T | T | T | T | T | T | T | T | T | T | T | T | T | T | T | T | T   | T   | T   | 50% | 39% |     |     |     |     |     |     |     |
| PARL-NM_001324436.2eU596-NP_001311365.1aa188LL     | 0 |     |     |     |     | 3 | 7%  | 2% | 0 | 470 | 110 | 760 | 230 | 370 | C | T | T | T | T | T | T | T | T | T | T | T | T | T | T | T | T | T | T | T | T | T | T | T | T | T | T | T | T   | T   | 9%  | 5%  | 8%  |     |     |     |     |     |     |     |
| PCLAF-NM_014736.6eU415-3UTR+9                      | 0 |     |     |     |     | 2 | 2%  | 1% | 0 | 440 | 210 | 680 | 500 | 370 | C | A | C | A | A | T | G | A | T | A | A | A | A | G | A | T | A | G | A | C | T | T | T | T | T | T | T | T | T   | T   | T   | 2%  | 2%  |     |     |     |     |     |     |     |
| PCSK9-NM_174936.4eU279-5UTR-13                     | 0 |     |     |     |     | 3 | 13% | 8% | 0 | 350 | 340 | 730 | 160 | 300 | C | T | A | G | T | C | T | C | T | C | G | C | A | G | A | C | A | G | C | A | C | C | C | C | C | C | C | C | C   | C   | C   | 9%  | 22% | 9%  |     |     |     |     |     |     |
| PCYOX1-NM_016297.4eU5208-3UTR+3662                 | 0 |     |     |     |     | 3 | 16% | 7% | 0 | 230 | 210 | 750 | 120 | 420 | T | A | G | T | A | A | T | A | C | A | T | T | T | T | T | T | T | T | T | T | T | T | T | T | T | T | T | T | T   | T   | 8%  | 22% | 17% |     |     |     |     |     |     |     |
| PEG10-NM_001040152.2eU3267-3UTR+1855               | 0 |     |     |     |     | 2 | 2%  | 0% | 3 | 380 | 300 | 690 | 290 | 540 | C | A | T | C | T | C | A | G | G | C | T | G | A | A | A | A | A | A | A | A | A | A | A | A | A | A | A | A | A   | A   | 2%  | 2%  |     |     |     |     |     |     |     |     |
| PHACTR2-NM_001100164.2eU6956-3UTR+4819             | 0 |     |     |     |     | 3 | 41% | 6% | 0 | 240 | 230 | 600 | 180 | 440 | A | C | C | A | A | T | G | C | T | T | T | T | T | T | T | T | T | T | T | T | T | T | T | T | T | T | T | T | T   | T   | 39% | 36% | 47% | 8%  | 10% | 9%  |     |     |     |     |
| PHF6-NM_001015877.2eU2407-3UTR+1107                | 0 |     |     |     |     | 3 | 5%  | 1% | 0 | 350 | 290 | 860 | 260 | 490 | A | A | G | A | A | C | C | A | G | T | T | T | T | T | T | T | T | T | T | T | T | T | T | T | T | T | T | T | T   | T   | 4%  | 5%  | 5%  |     |     |     |     |     |     |     |
| PHF6-NM_001015877.2eU4050-3UTR+2750                | 0 |     |     |     |     | 2 | 4%  | 2% | 0 | 400 | 100 | 740 | 220 | 390 | G | A | G | A | T | T | T | T | T | T | T | T | T | T | T | T | T | T | T | T | T | T | T | T | T | T | T | T | T   | T   | 4%  | 5%  | 2%  |     |     |     |     |     |     |     |
| PHYKPL-XM_024446242.1eU1589-5UTR-2097              | 0 |     |     |     |     | 2 | 21% | 6% | 0 | 340 | 250 | 570 | 420 | 410 | A | G | T | G | G | T | T | A | A | A | C | A | A | A | A | A | A | A | A | A | A | A | A | A | A | A | A | A | A   | A   | 17% | 25% |     |     |     |     |     |     |     |     |
| PK3CB-NM_001256045.2eU2677-3UTR+582                | 0 |     |     |     |     | 2 | 13% | 5% | 0 | 260 | 240 | 730 | 220 | 200 | T | A | A | T | A | T | T | T | T | T | T | T | T | T | T | T | T | T | T | T | T | T | T | T | T | T | T | T | T   | 17% | 10% |     |     |     |     |     |     |     |     |     |
| PLSCR3-NM_001369421.1eU185-5UTR-73                 | 0 |     |     |     |     | 2 | 7%  | 2% | 0 | 300 | 160 | 790 | 80  | 380 | C | A | G | A | A | C | T | A | A | G | C | A | C | A | G | A | C | A | G | C | A | T | C | T | C | A | T | C | T   | C   | A   | 6%  | 6%  | 9%  |     |     |     |     |     |     |
| PLXNA1-NM_032242.4eU6746-3UTR+809                  | 0 |     |     |     |     | 2 | 6%  | 0% | 0 | 370 | 180 | 750 | 250 | 350 | A | G | A | G | G | C | C | C | G | G | T | C | C | A | G | A | G | A | G | A | G | A | G | A | G | A | G | A | G   | A   | 6%  | 6%  | 6%  |     |     |     |     |     |     |     |
| PMS2-NM_000535.7eU2687-3UTR+68                     | 0 |     |     |     |     | 3 | 32% | 7% | 3 | 470 | 160 | 740 | 220 | 470 | A | T | T | T | T | T | T | T | T | T | T | T | T | T | T | T | T | T | T | T | T | T | T | T | T | T | T | T | T   | 28% | 31% | 40% | 36% | 29% | 38% |     |     |     |     |     |
| POU2F2-NM_001207025.4eU5695-3UTR+4220              | 4 | 37% | 19% | 40% | 22% | 3 | 38% | 8% | 1 | 390 | 80  | 460 | 280 | 180 | A | C | C | T | G | A | C | T | T | T | T | T | T | T | T | T | T | T | T | T | T | T | T | T | T | T | T | T | 40% | 19% | 63% | 27% |     |     |     |     |     |     |     |     |
| PPP2R3B-NM_0013239.5eU1286-NP_037371.2aa357SL      | 0 |     |     |     |     | 3 | 2%  | 1% | 0 | 310 | 150 | 910 | 100 | 420 | T | T | T | T | T | T | T | T | T | T | T | T | T | T | T | T | T | T | T | T | T | T | T | T | T | T | T | T | T   | 25% | 22% | 24% |     |     |     |     |     |     |     |     |
| PPP2R5C-NM_001161725.2eU1123-NP_001155197.1aa313TM | 0 |     |     |     |     | 2 | 2%  | 0% | 0 | 280 | 160 | 690 | 210 | 390 | T | G | C | A | G | T | T | T | T | T | T | T | T | T | T | T | T | T | T | T | T | T | T | T | T | T | T | T | T   | 3%  | 2%  |     |     |     |     |     |     |     |     |     |
| PPP6R3-NM_001352354.2eU135-5UTR-227                | 0 |     |     |     |     | 2 | 7%  | 1% | 0 | 490 | 100 | 650 | 370 | 370 | C | A | T | T | C | T | C | A | A | T | A | T | A | G | T | A | G | A | C | T | T | T | T | T | T | T | T | T | T   | 8%  | 7%  |     |     |     |     |     |     |     |     |     |
| PRPL-NM_001042385.2eU829-NP_001035844.1aa265LL     | 0 |     |     |     |     | 2 | 14% | 4% | 3 | 380 | 180 | 470 | 530 | 310 | C | T | T | T | T | T | T | T | T | T | T | T | T | T | T | T | T | T | T | T | T | T | T | T | T | T | T | T | 11% | 17% |     |     |     |     |     |     |     |     |     |     |
| PRKCA-NM_002737.3eU6655-3UTR+4397                  | 0 |     |     |     |     | 3 | 9%  | 2% | 0 | 290 | 250 | 610 | 420 | 310 | A | A | G | G | T | G | A | T | A | C | C | T | C | T | G | A | C | A | G | T | C | A | T | T | T | T | T | T | T   | 10% | 6%  | 10% |     |     |     |     |     |     |     |     |
| PRKCI-NM_002740.6eU493-NP_002731.4aa83Q*           | 0 |     |     |     |     | 2 | 5%  | 2% | 0 | 250 | 110 | 720 | 120 | 360 | G | A | G | A | A | C | G | A | A | C | C | C | G | T | T | A | C | A | G | T | A | C | A | T | C | A | T | C | A   | 4%  | 6%  |     |     |     |     |     |     |     |     |     |
| PRMT6-NM_018137.3eU2095-3UTR+925                   | 0 |     |     |     |     | 2 | 9%  | 1% | 0 | 290 | 410 | 780 | 480 | 540 | A | A | C | T | C | A | C | T | A | A | T | T | T | T | T | T | T | T | T | T | T | T | T | T | T | T | T | T | T   | 10% | 8%  |     |     |     |     |     |     |     |     |     |
| PRR11-NM_018304.4eU376-NP_060774.2aa104PL          | 0 |     |     |     |     | 2 | 4%  | 2% | 0 | 320 | 240 | 800 | 320 | 320 | G | T | T | A | G | A | A | G | T | T | T | T | T | T | T | T | T | T | T | T | T | T | T | T | T | T | T | T | T   | 9%  | 10% | 11% |     |     |     |     |     |     |     |     |

































































Table with columns: Accession ID, Count, Percent, and Sequence alignment. Contains genomic coordinates and nucleotide alignments (A, C, G, T, N) for various sequences. The table ends with a summary of overall counts for each nucleotide across the entire dataset.











|                                                    |   |     |    |     |     |         |     |         |                                     |                           |             |     |     |     |
|----------------------------------------------------|---|-----|----|-----|-----|---------|-----|---------|-------------------------------------|---------------------------|-------------|-----|-----|-----|
| ZNF451-NM_001031623.3eU2201-NP_001026794.1aa712PL  | 0 | 0   | 3  | 9%  | 3%  | 320 340 | 650 | 350 200 | A A A C T T C A A T T T A A A A C   | G A A G A T G A T T T T C | A G T A A   | 11% | 8%  | 6%  |
| ZNF451-NM_001257273.2eU1721-NP_001244202.1aa552PL  | 0 | 0   | 2  | 14% | 7%  | 460 260 | 590 | 370 200 | C C T A T A G A T A T A G A A G     | A A G G A G A C T C T C   | A G A A C   | 10% | 18% |     |
| ZNF461-NM_001297623.3eU134-5UTR-96                 | 0 | 0   | 2  | 9%  | 1%  | 380 310 | 470 | 370 340 | T C C G A A T C A G A G C T T G G   | A C C A G A G C T T C C   | T G A G A   | 10% | 8%  |     |
| ZNF461-NM_001297623.3eU1756-NP_001284552.1aa510HY  | 0 | 0   | 3  | 31% | 2%  | 320 230 | 770 | 290 290 | A A A C C T T A T C A A T G C G G   | G A G G C G T T T A A T   | C A T A G A | 33% | 29% | 30% |
| ZNF462-NM_001347997.2eU4898-NP_001334926.1aa1560Q* | 0 | 0   | 2  | 8%  | 4%  | 250 260 | 680 | 420 560 | C C A T G T G A A T T T T G T G G   | A C G G C G T T T T C A   | C A G G G C | 10% | 5%  |     |
| ZNF473-NM_001006656.4eU2238-NP_001006657.1aa684TI  | 0 | 3   | 2  | 6%  | 3%  | 440 300 | 690 | 100 420 | T T A A A T G T A G T A A G T G T   | G A C A G A G T C T T C A | C C C A G A | 6%  | 5%  | 5%  |
| ZNF518A-NM_001278524.2eU822-5UTR-83                | 0 | 0   | 2  | 41% | 20% | 520 140 | 700 | 250 220 | G A A A A T C C T G T A T A T T G A | A G A T G T C T C T A     | C A C A G T | 4%  | 27% | 8%  |
| ZNF518B-NM_001375816.1eU4914-3UTR-973              | 0 | 0   | 2  | 14% | 0%  | 410 70  | 780 | 260 270 | T C C A A A G A C C A T G G G T G   | G A T G C T T T C T       | T C T T C   | 8%  | 10% | 14% |
| ZNF566-NM_001145343.1eU1270-NP_001138815.1aa379Q*  | 3 | 11% | 1% | 11% | 1%  | 280 240 | 820 | 280 370 | G A A T G T A A G A T A T G T G G   | G A A G G C T T A T T C T | C A G A G T | 12% | 11% | 10% |
| ZNF592-NM_014630.3eU240-5UTR-93                    | 0 | 0   | 3  | 12% | 9%  | 330 260 | 580 | 490 270 | A C G G G A G A A G A C A A A G     | G A A G A C G T C C C C   | G T A C G   | 5%  | 10% | 22% |
| ZNF598-NM_178167.4eU1411-NP_835461.2aa446PL        | 0 | 0   | 2  | 5%  | 2%  | 250 290 | 680 | 360 180 | C A G C C C G A A G C T C A A G     | G A C G A A G A C T T C C | C A G C C   | 3%  | 6%  | 6%  |
| ZNF623-NM_001082480.2eU881-NP_001075949.1aa178HY   | 0 | 0   | 3  | 18% | 2%  | 420 300 | 830 | 290 330 | A A A T G T G C G C A G T G T G G   | G A A G G C G T T T T G T | C A C A G T | 15% | 19% | 19% |
| ZNF638-NM_001014972.3eU3685-NP_001014972.1aa1133PP | 0 | 0   | 3  | 4%  | 2%  | 350 270 | 500 | 430 400 | A C C T A A T G A G C T T G A A G   | A A G A A A G T A C T C C | C A G C A T | 3%  | 4%  | 6%  |
| ZNF639-NM_001375800.1eU440-5UTR-186                | 0 | 0   | 3  | 27% | 6%  | 350 260 | 760 | 460 470 | T T T G T A T T T T C A G T C G G   | A C G G G G T T T C C C   | C A T G T T | 20% | 3%  | 29% |
| ZNF664-NM_001204298.2eU1521-NP_001191227.1aa182Q*  | 0 | 0   | 3  | 6%  | 2%  | 260 280 | 700 | 230 360 | A A A T G T T A T G A G T G T G G   | G A A G G C G T T C A G T | C A G A G T | 4%  | 7%  | 8%  |
| ZNF670-NM_001204220.2eU1677-3UTR+295               | 0 | 0   | 3  | 19% | 10% | 320 230 | 730 | 220 380 | A G T G G T T C A T T G T T A A A   | G A A G G T G T C A T A   | C T T T A G | 12% | 16% | 30% |
| ZNF689-NM_138447.3eU710-NP_612456.1aa121PL         | 0 | 0   | 3  | 14% | 2%  | 430 180 | 610 | 530 290 | G A A G A A G A A T G G G G A G     | A A G A A G T A T T C C   | C G C C T A | 12% | 14% | 15% |
| ZNF697-NM_001080470.2eU4946-3UTR+2695              | 0 | 0   | 3  | 12% | 3%  | 470 170 | 350 | 410 350 | T A A A T G C A T T C A G G A G G   | T T G T T G T T T C T T   | C T A T C T | 11% | 10% | 16% |
| ZNF71-NM_001370214.1eU2657-3UTR+1057               | 0 | 0   | 2  | 27% | 5%  | 250 200 | 530 | 310 480 | G T A G T G C T T G T G T C T T G   | A T G T G T G T C T T C A | G T G G T   | 3%  | 7%  | 7%  |
| ZNF736-NM_001170905.3eU5870-3UTR+4396              | 0 | 0   | 2  | 35% | 14% | 470 60  | 650 | 290 130 | A A C T C T T A C A C T T T G A T   | G C T G T G T C T T       | C A T T T C | 25% |     | 44% |
| ZNF740-NM_001004304.4eU1000-NP_001004304.1aa193LL  | 0 | 0   | 2  | 15% | 11% | 350 260 | 610 | 300 560 | C A G T C C A A G A C T T T C G G   | A C G G C A G T T T T C T | T A T A G   | 7%  | 22% |     |
| ZNF765-NM_001040185.3eU4054-3UTR+2364              | 0 | 0   | 2  | 11% | 5%  | 420 320 | 690 | 500 410 | T T T G T A T T T T T A G T A G A   | G A T G G G G T T T C T C | C A T G T T | 8%  |     | 15% |
| ZNF780B-NM_001005851.3eU5120-3UTR+2530             | 0 | 0   | 2  | 30% | 16% | 300 70  | 750 | 80 470  | T A A G T A A T C T A T G G A G A   | G A C G T T G T C A T C T | T G A A A   | 19% |     | 41% |
| ZNF865-NM_001195605.2eU540-NP_001182534.1aa143PL   | 0 | 0   | 3  | 20% | 6%  | 250 350 | 630 | 400 260 | C C C C T C C T C C C C T C T T T   | G A C G C T G C T T T C C | C A C T C   | 26% | 18% | 15% |
| ZNRF1-NM_032268.5eU1685-3UTR+353                   | 0 | 0   | 2  | 19% | 4%  | 310 330 | 570 | 430 450 | A A A A A G T C A G T G T C G       | A C T G T G T T T T C C   | C T C G T G | 16% |     | 21% |
| ZRANB2-NM_005455.5eU582-NP_005446.2aa181SL         | 0 | 0   | 3  | 6%  | 2%  | 260 230 | 650 | 230 330 | A G G A T G A G G A T G A A G A T   | G A C G C T G A T C T C T | C A A A A T | 3%  | 7%  | 7%  |
| ZSCAN12-NM_001163391.2eU1681-NP_001156863.1aa508Q* | 0 | 0   | 3  | 22% | 3%  | 320 280 | 840 | 290 390 | A A A T G T G A T A A G T G T G G   | G A A G G C G T T T A C T | C A A A G A | 22% | 20% | 25% |
| ZSCAN12-NR_028077.2eU3726-ncr                      | 0 | 0   | 3  | 20% | 10% | 350 260 | 690 | 460 410 | T T T G T A T T T T T A G T A G A   | G A C G G G T T T C A C   | C A T G T T | 31% | 13% | 16% |
| ZSCAN23-XM_011514406.2eU1848-3UTR+499              | 0 | 0   | 2  | 18% | 5%  | 260 130 | 810 | 290 400 | C A T G A G G T T T A A G G A A A   | G A A G C T G T C C A     | C A A C A T | 16% |     | 21% |
| ZSWIM7-NM_001042697.2eU308-NP_001036162.1aa66YY    | 0 | 0   | 3  | 39% | 12% | 360 450 | 740 | 260 240 | A A T C T C A T C A C C C A G G     | G A A G G C G T G T T A   | C A G G T   | 26% | 48% | 44% |
| ZSWIM8-NM_001242487.2eU4898-NP_001229416.1aa1542PL | 0 | 0   | 2  | 8%  | 2%  | 210 140 | 620 | 320 290 | T G C C T C A C A T G C C C C G G   | C C T G C C G T C T T C C | C T G T G C | 10% |     | 7%  |
| ZYX-NM_001010972.2eU358-NP_001010972.1aa94PL       | 0 | 0   | 3  | 2%  | 1%  | 310 390 | 680 | 330 370 | A T G C A G A G G G T G C T G G     | A G T G C T T C C         | G C C G C   | 2%  | 2%  | 3%  |



## Supplementary Table S5

**PPR65 off-targets detected in the IMR-90 transcriptome.** Off-targets appearing in at least two replicates of HA-His<sub>6</sub>-MBP-PPR65 in the transcriptome of IMR-90. The off-target label reveals the gene ID, the transcript accession with the position of the edited C, the corresponding protein accession with the position of the affected amino acid and the induced amino acid change. Off-targets in non-coding regions are labeled with 'npc'. Shown are the number of replicates, in which the site was called (Rep.) and the mean C-U conversion rates (%CU) with standard deviations (STABW). Nucleotides from position -30 up- to +5 downstream of the editing sites are listed and nucleotide shading is based on the PPR-RNA binding code with perfect matches in green and moderate matches (transition) in yellow (see Figure 1). Conversion rates of individual replicates (labeled as in Supplementary table S3) are depicted.

>total: 7

| Offtarget                                         | Rep. | %CU | STABW | Binding region                                                                | % editing in individual replicates |      |      |
|---------------------------------------------------|------|-----|-------|-------------------------------------------------------------------------------|------------------------------------|------|------|
|                                                   |      |     |       |                                                                               | I-9                                | I-10 | I-12 |
| TCP11L1-NM_001145541.1eU481-NP_001139013.1aa89-Q* | 2    | 8%  | 1%    | G C C C A T G A A A T T G T A G T A A A T G G A G A C T T T C A G A T T       | 7%                                 | 9%   |      |
| NDUFAF3-NM_199069.2eU523-npc                      | 3    | 6%  | 2%    | T G T C A T G A A G G C C G A G T A A C T G G A G C T G C T C T C A T C       | 8%                                 | 6%   | 4%   |
| EML4-NM_001145076.3eU1496-NP_001138548.2aa413-LF  | 2    | 3%  | 1%    | T G T T T A G C A T T C T T G G G A A T G G A G A T G T T C T T A C T         |                                    | 3%   | 2%   |
| MRPL14-NM_001318767.2eU572-npc                    | 2    | 2%  | 0%    | C T G G T T G C A G G A C T C G T G A A T G G A G C A G T T C T G A G A       |                                    | 2%   | 2%   |
| SPDYE16-XM_017012887.2eU206-npc                   | 3    | 13% | 5%    | G G A G A A A A T C A G A A A G A T G G C T T A G A G A A G C C A G C A       | 9%                                 | 18%  | 12%  |
| HMG1-NM_011529543.2eU1210-npc                     | 2    | 7%  | 1%    | C A G C C T C T G A T G A A G C A G G A G A G A A A A G A G A A G C C A A G T | 6%                                 | 7%   |      |
| EPB41L1-XM_024451852.1eU174-npc                   | 2    | 6%  | 3%    | C C C G C G C C G C C C G C C C G C C C G G C C T G C C T G C C A G A G       |                                    | 8%   | 4%   |

## References

1. Lenz,H., Hein,A. and Knoop,V. (2018) Plant organelle RNA editing and its specificity factors: enhancements of analyses and new database features in PREPACT 3.0. *BMC Bioinformatics*, **19**, 255.
2. Barkan,A., Rojas,M., Fujii,S., Yap,A., Chong,Y.S., Bond,C.S. and Small,I. (2012) A combinatorial amino acid code for RNA recognition by pentatricopeptide repeat proteins. *PLoS Genet.*, **8**, e1002910.
3. Oldenkott,B., Yang,Y., Lesch,E., Knoop,V. and Schallenberg-Rüdinger,M. (2019) Plant-type pentatricopeptide repeat proteins with a DYW domain drive C-to-U RNA editing in *Escherichia coli*. *Commun. Biol.*, **2**, 85.
